# Supplementary material for: Network Pharmacology Deciphers the Action of Bioactive Polypeptide in Attenuating Inflammatory Osteolysis via the Suppression of Oxidative Stress and Restoration of Bone Remodeling Balance
Source: Hindawi journal article supplement (doi:10.1155/2022/4913534), 2022-01-01
Supplement: f1 [file 4913534.f1.pdf]

**Supplement Table 1. 100 putative targets of D7.**

| <b>Number</b> | <b>Protein name</b>                                       | <b>Gene name</b> |
|---------------|-----------------------------------------------------------|------------------|
| 1             | Integrin alpha-3                                          | ITGA3            |
| 2             | Integrin alpha-4/beta-1                                   | ITGB1 ITGA4      |
| 3             | Integrin alpha-4/beta-7                                   | ITGB7 ITGA4      |
| 4             | Integrin alpha-IIb/beta-3                                 | ITGA2B ITGB3     |
| 5             | Integrin alpha-V/beta-3                                   | ITGAV ITGB3      |
| 6             | Integrin alpha-5/beta-1                                   | ITGB1 ITGA5      |
| 7             | SPRY domain-containing SOCS box protein 2                 | SPSB2            |
| 8             | Oxytocin receptor (by homology)                           | OXTR             |
| 9             | Beta-secretase 1                                          | BACE1            |
| 10            | HLA class I histocompatibility antigen A-3                | HLA-A            |
| 11            | Mu opioid receptor (by homology)                          | OPRM1            |
| 12            | Adenosine A2a receptor                                    | ADORA2A          |
| 13            | Integrin alpha-4                                          | ITGA4            |
| 14            | Delta opioid receptor (by homology)                       | OPRD1            |
| 15            | Vasopressin V1b receptor                                  | AVPR1B           |
| 16            | DNA (cytosine-5)-methyltransferase 1                      | DNMT1            |
| 17            | DNA (cytosine-5)-methyltransferase 3B                     | DNMT3B           |
| 18            | C3a anaphylatoxin chemotactic receptor                    | C3AR1            |
| 19            | Leukocyte common antigen                                  | PTPRC            |
| 20            | Aminopeptidase A                                          | ENPEP            |
| 21            | Inhibitor of apoptosis protein 3                          | XIAP             |
| 22            | Thromboxane-A synthase                                    | TBXAS1           |
| 23            | Cholecystokinin A receptor                                | CCKAR            |
| 24            | Baculoviral IAP repeat-containing protein 3               | BIRC3            |
| 25            | CD22                                                      | CD22             |
| 26            | Disks large homolog 4                                     | DLG4             |
| 27            | Protein-tyrosine phosphatase 1B                           | PTPN1            |
| 28            | T-cell protein-tyrosine phosphatase                       | PTPN2            |
| 29            | NAD-dependent deacetylase sirtuin 1                       | SIRT1            |
| 30            | Melanocortin receptor 4                                   | MC4R             |
| 31            | Insulin-degrading enzyme                                  | IDE              |
| 32            | Purinergic receptor P2Y12                                 | P2RY12           |
| 33            | Growth factor receptor-bound protein 2                    | GRB2             |
| 34            | Calcium sensing receptor                                  | CASR             |
| 35            | Vasopressin V2 receptor (by homology)                     | AVPR2            |
| 36            | Vasopressin V1a receptor (by homology)                    | AVPR1A           |
| 37            | Scavenger receptor class B member 1                       | SCARB1           |
| 38            | Angiotensin-converting enzyme                             | ACE              |
| 39            | Histone-lysine N-methyltransferase, H3 lysine-79 specific | DOT1L            |
| 40            | Casein kinase II alpha                                    | CSNK2A1          |
| 41            | Heat shock protein HSP 90-alpha                           | HSP90AA1         |
| 42            | Casein kinase II alpha (prime)                            | CSNK2A2          |

|    |                                                                                   |         |
|----|-----------------------------------------------------------------------------------|---------|
| 43 | Serine/threonine protein phosphatase 2A, catalytic subunit, alpha isoform         | PPP2CA  |
| 44 | P-selectin                                                                        | SELP    |
| 45 | Serine/threonine-protein phosphatase                                              | PPP5C   |
| 46 | TNF-alpha                                                                         | TNF     |
| 47 | Serine/threonine protein phosphatase PP1-alpha catalytic subunit                  | PPP1CA  |
| 48 | Transcription factor AP1                                                          | FOS     |
| 49 | C-C chemokine receptor type 5                                                     | CCR5    |
| 50 | Tyrosine-protein kinase LCK                                                       | LCK     |
| 51 | Ileal bile acid transporter                                                       | SLC10A2 |
| 52 | Carbonic anhydrase II                                                             | CA2     |
| 53 | Beta-3 adrenergic receptor                                                        | ADRB3   |
| 54 | Carbonic anhydrase I                                                              | CA1     |
| 55 | Adenosine A1 receptor                                                             | ADORA1  |
| 56 | Adenosine A3 receptor                                                             | ADORA3  |
| 57 | Tyrosine-protein kinase SYK                                                       | SYK     |
| 58 | Myelin-associated glycoprotein                                                    | MAG     |
| 59 | Platelet-derived growth factor receptor beta                                      | PDGFRB  |
| 60 | Thymidylate synthase (by homology)                                                | TYMS    |
| 61 | Protein phosphatase 2C beta                                                       | PPM1B   |
| 62 | Serine/threonine protein phosphatase PP1-gamma catalytic subunit                  | PPP1CC  |
| 63 | Serine/threonine protein phosphatase 2A, 56 kDa regulatory subunit, alpha isoform | PPP2R5A |
| 64 | Lysosomal protective protein                                                      | CTSA    |
| 65 | Cathepsin D                                                                       | CTSD    |
| 66 | Inhibitor of nuclear factor kappa B kinase beta subunit                           | IKBKB   |
| 67 | EZH2/SUZ12/EED/RBBP7/RBBP4                                                        | EZH2    |
| 68 | Peptidyl-prolyl cis-trans isomerase NIMA-interacting 1                            | PIN1    |
| 69 | Tissue-type plasminogen activator                                                 | PLAT    |
| 70 | Coagulation factor XI                                                             | F11     |
| 71 | Coagulation factor VII                                                            | F7      |
| 72 | Peroxisome proliferator-activated receptor gamma                                  | PPARG   |
| 73 | Squalene synthetase (by homology)                                                 | FDFT1   |
| 74 | GABA transporter 1 (by homology)                                                  | SLC6A1  |
| 75 | HERG                                                                              | KCNH2   |
| 76 | Disintegrin and metalloproteinase domain-containing protein 8                     | ADAM8   |
| 77 | Glutamate receptor ionotropic kainate 1                                           | GRIK1   |
| 78 | Glutamate receptor ionotropic kainate 2                                           | GRIK2   |
| 79 | Glutamate receptor ionotropic kainate 3                                           | GRIK3   |
| 80 | ALK tyrosine kinase receptor                                                      | ALK     |
| 81 | Serotonin 2b (5-HT2b) receptor                                                    | HTR2B   |
| 82 | Alpha-2a adrenergic receptor                                                      | ADRA2A  |

|     |                                                  |        |
|-----|--------------------------------------------------|--------|
| 83  | Adrenergic receptor alpha-2                      | ADRA2C |
| 84  | Alpha-2b adrenergic receptor                     | ADRA2B |
| 85  | Dopamine D1 receptor                             | DRD1   |
| 86  | Dopamine D2 receptor                             | DRD2   |
| 87  | Alpha-1d adrenergic receptor                     | ADRA1D |
| 88  | Serotonin 2a (5-HT2a) receptor                   | HTR2A  |
| 89  | Serotonin 2c (5-HT2c) receptor                   | HTR2C  |
| 90  | Alpha-1a adrenergic receptor (by homology)       | ADRA1A |
| 91  | Dopamine D3 receptor                             | DRD3   |
| 92  | Peroxisome proliferator-activated receptor alpha | PPARA  |
| 93  | Cytochrome P450 2D6                              | CYP2D6 |
| 94  | Serotonin 6 (5-HT6) receptor                     | HTR6   |
| 95  | Sodium/glucose cotransporter 2                   | SLC5A2 |
| 96  | Matrix metalloproteinase 10                      | MMP10  |
| 97  | Matrix metalloproteinase 12                      | MMP12  |
| 98  | Serotonin 1b (5-HT1b) receptor (by homology)     | HTR1B  |
| 99  | Kallikrein 1                                     | KLK1   |
| 100 | Alpha-1b adrenergic receptor                     | ADRA1B |

---
