# Supplementary material for: Network Pharmacology Deciphers the Action of Bioactive Polypeptide in Attenuating Inflammatory Osteolysis via the Suppression of Oxidative Stress and Restoration of Bone Remodeling Balance
Source: Hindawi journal article supplement (doi:10.1155/2022/4913534), 2022-01-01
Supplement: f2 [file 4913534.f2.pdf]

**Supplement Table 2. 1219 human genes of inflammatory osteolysis-related.**

| <b>Number</b> | <b>Protein name</b>                                        | <b>Gene name</b> |
|---------------|------------------------------------------------------------|------------------|
| 1             | Matrix Metallopeptidase 2                                  | MMP2             |
| 2             | Nucleotide Binding Oligomerization Domain Containing 2     | NOD2             |
| 3             | Interleukin 10                                             | IL10             |
| 4             | Interleukin 6                                              | IL6              |
| 5             | MAF BZIP Transcription Factor B                            | MAFB             |
| 6             | Tumor Necrosis Factor                                      | TNF              |
| 7             | TNF Receptor Superfamily Member 11a                        | TNFRSF11A        |
| 8             | Transforming Growth Factor Beta 1                          | TGFB1            |
| 9             | ADAM Metallopeptidase Domain 17                            | ADAM17           |
| 10            | Lysophosphatidylcholine Acyltransferase 2                  | LPCAT2           |
| 11            | Interleukin 1 Beta                                         | IL1B             |
| 12            | Matrix Metallopeptidase 14                                 | MMP14            |
| 13            | C-X-C Motif Chemokine Ligand 8                             | CXCL8            |
| 14            | Receptor Interacting Serine/Threonine Kinase 1             | RIPK1            |
| 15            | NLR Family Pyrin Domain Containing 3                       | NLRP3            |
| 16            | Interleukin 23 Receptor                                    | IL23R            |
| 17            | Toll Like Receptor 4                                       | TLR4             |
| 18            | Interferon Gamma                                           | IFNG             |
| 19            | Major Histocompatibility Complex, Class II, DR Beta 1      | HLA-DRB1         |
| 20            | C-Reactive Protein                                         | CRP              |
| 21            | Prostaglandin-Endoperoxide Synthase 2                      | PTGS2            |
| 22            | Epidermal Growth Factor Receptor                           | EGFR             |
| 23            | C-C Motif Chemokine Ligand 2                               | CCL2             |
| 24            | Interleukin 1 Receptor Antagonist                          | IL1RN            |
| 25            | C-C Motif Chemokine Ligand 3                               | CCL3             |
| 26            | Interleukin 1 Alpha                                        | IL1A             |
| 27            | Interferon Regulatory Factor 5                             | IRF5             |
| 28            | TNF Superfamily Member 11                                  | TNFSF11          |
| 29            | Interleukin 4                                              | IL4              |
| 30            | Interleukin 17A                                            | IL17A            |
| 31            | TNF Receptor Superfamily Member 1A                         | TNFRSF1A         |
| 32            | ATP Binding Cassette Subfamily B Member 1                  | ABCB1            |
| 33            | Interleukin 13                                             | IL13             |
| 34            | BAF Nuclear Assembly Factor 1                              | BANF1            |
| 35            | MEFV Innate Immunity Regulator, Pyrin                      | MEFV             |
| 36            | Major Histocompatibility Complex, Class I, B               | HLA-B            |
| 37            | Interleukin 2                                              | IL2              |
| 38            | C-C Motif Chemokine Receptor 6                             | CCR6             |
| 39            | Proline-Serine-Threonine Phosphatase Interacting Protein 1 | PSTPIP1          |
| 40            | C-C Motif Chemokine Ligand 4                               | CCL4             |
| 41            | Notch Receptor 2                                           | NOTCH2           |
| 42            | Toll Like Receptor 2                                       | TLR2             |

|    |                                                    |           |
|----|----------------------------------------------------|-----------|
| 43 | TNF Receptor Superfamily Member 11b                | TNFRSF11B |
| 44 | Tumor Protein P53                                  | TP53      |
| 45 | Intercellular Adhesion Molecule 1                  | ICAM1     |
| 46 | Cytotoxic T-Lymphocyte Associated Protein 4        | CTLA4     |
| 47 | Interleukin 2 Receptor Subunit Alpha               | IL2RA     |
| 48 | Protein Tyrosine Phosphatase Non-Receptor Type 22  | PTPN22    |
| 49 | C-C Motif Chemokine Receptor 1                     | CCR1      |
| 50 | Interleukin 12B                                    | IL12B     |
| 51 | Mitogen-Activated Protein Kinase 14                | MAPK14    |
| 52 | Prostaglandin-Endoperoxide Synthase 1              | PTGS1     |
| 53 | C-C Motif Chemokine Ligand 5                       | CCL5      |
| 54 | Signal Transducer And Activator Of Transcription 1 | STAT1     |
| 55 | Lamin A/C                                          | LMNA      |
| 56 | Vascular Endothelial Growth Factor A               | VEGFA     |
| 57 | Interferon Induced With Helicase C Domain 1        | IFIH1     |
| 58 | Lymphotoxin Alpha                                  | LTA       |
| 59 | Matrix Metalloproteinase 9                         | MMP9      |
| 60 | Platelet Derived Growth Factor Receptor Alpha      | PDGFRA    |
| 61 | Macrophage Migration Inhibitory Factor             | MIF       |
| 62 | Arachidonate 5-Lipoxygenase                        | ALOX5     |
| 63 | C-C Motif Chemokine Receptor 5                     | CCR5      |
| 64 | Interleukin 1 Receptor Type 1                      | IL1R1     |
| 65 | Spleen Associated Tyrosine Kinase                  | SYK       |
| 66 | C-C Motif Chemokine Ligand 11                      | CCL11     |
| 67 | Secreted Phosphoprotein 1                          | SPP1      |
| 68 | Sequestosome 1                                     | SQSTM1    |
| 69 | Interleukin 5                                      | IL5       |
| 70 | Signal Transducer And Activator Of Transcription 3 | STAT3     |
| 71 | C-C Motif Chemokine Ligand 20                      | CCL20     |
| 72 | Interleukin 18                                     | IL18      |
| 73 | ALK Receptor Tyrosine Kinase                       | ALK       |
| 74 | Matrix Metalloproteinase 1                         | MMP1      |
| 75 | Nuclear Factor Kappa B Subunit 1                   | NFKB1     |
| 76 | Elastase, Neutrophil Expressed                     | ELANE     |
| 77 | Zinc Metalloproteinase STE24                       | ZMPSTE24  |
| 78 | Interleukin 6 Receptor                             | IL6R      |
| 79 | NFKB Inhibitor Alpha                               | NFKBIA    |
| 80 | C-X-C Motif Chemokine Ligand 10                    | CXCL10    |
| 81 | Colony Stimulating Factor 1                        | CSF1      |
| 82 | Platelet Derived Growth Factor Receptor Beta       | PDGFRB    |
| 83 | Selectin E                                         | SELE      |
| 84 | Peripheral Myelin Protein 22                       | PMP22     |
| 85 | TNF Receptor Superfamily Member 1B                 | TNFRSF1B  |
| 86 | Albumin                                            | ALB       |

|     |                                                                     |          |
|-----|---------------------------------------------------------------------|----------|
| 87  | C-X-C Motif Chemokine Ligand 2                                      | CXCL2    |
| 88  | Adiponectin, C1Q And Collagen Domain Containing                     | ADIPOQ   |
| 89  | Signal Transducer And Activator Of Transcription 4                  | STAT4    |
| 90  | Proteinase 3                                                        | PRTN3    |
| 91  | Fas Cell Surface Death Receptor                                     | FAS      |
| 92  | Nitric Oxide Synthase 2                                             | NOS2     |
| 93  | Inhibitor Of Nuclear Factor Kappa B Kinase Regulatory Subunit Gamma | IKBKG    |
| 94  | Colony Stimulating Factor 2                                         | CSF2     |
| 95  | MicroRNA 146a                                                       | MIR146A  |
| 96  | Vascular Cell Adhesion Molecule 1                                   | VCAM1    |
| 97  | Major Histocompatibility Complex, Class I, C                        | HLA-C    |
| 98  | CD40 Molecule                                                       | CD40     |
| 99  | Leptin                                                              | LEP      |
| 100 | C-X-C Motif Chemokine Receptor 4                                    | CXCR4    |
| 101 | Inhibitor Of Nuclear Factor Kappa B Kinase Subunit Beta             | IKBKB    |
| 102 | CD40 Ligand                                                         | CD40LG   |
| 103 | Janus Kinase 2                                                      | JAK2     |
| 104 | MYD88 Innate Immune Signal Transduction Adaptor                     | MYD88    |
| 105 | Interleukin 15                                                      | IL15     |
| 106 | Caspase 1                                                           | CASP1    |
| 107 | Glucosamine (UDP-N-Acetyl)-2-Epimerase/N-Acetylmannosamine Kinase   | GNE      |
| 108 | Calcitonin Related Polypeptide Alpha                                | CALCA    |
| 109 | Matrix Metalloproteinase 3                                          | MMP3     |
| 110 | Major Histocompatibility Complex, Class II, DQ Alpha 1              | HLA-DQA1 |
| 111 | C-X-C Motif Chemokine Ligand 9                                      | CXCL9    |
| 112 | Vitamin D Receptor                                                  | VDR      |
| 113 | 15-Hydroxyprostaglandin Dehydrogenase                               | HPGD     |
| 114 | APC Regulator Of WNT Signaling Pathway                              | APC      |
| 115 | Endoplasmic Reticulum Aminopeptidase 1                              | ERAP1    |
| 116 | Interleukin 2 Receptor Subunit Beta                                 | IL2RB    |
| 117 | Notch Receptor 3                                                    | NOTCH3   |
| 118 | Interleukin 22                                                      | IL22     |
| 119 | Coagulation Factor V                                                | F5       |
| 120 | C-X-C Motif Chemokine Ligand 1                                      | CXCL1    |
| 121 | MicroRNA 155                                                        | MIR155   |
| 122 | Interleukin 36 Receptor Antagonist                                  | IL36RN   |
| 123 | Catenin Beta 1                                                      | CTNNB1   |
| 124 | Toll Like Receptor 3                                                | TLR3     |
| 125 | Complement C4A (Rodgers Blood Group)                                | C4A      |
| 126 | Major Histocompatibility Complex, Class II, DP Beta 1               | HLA-DPB1 |
| 127 | Adenosine Deaminase                                                 | ADA      |
| 128 | TIMP Metalloproteinase Inhibitor 1                                  | TIMP1    |

|     |                                                                 |          |
|-----|-----------------------------------------------------------------|----------|
| 129 | Jun Proto-Oncogene, AP-1 Transcription Factor Subunit           | JUN      |
| 130 | S100 Calcium Binding Protein A12                                | S100A12  |
| 131 | Interferon Beta 1                                               | IFNB1    |
| 132 | CD163 Molecule                                                  | CD163    |
| 133 | Caspase Recruitment Domain Family Member 14                     | CARD14   |
| 134 | Interleukin 1 Receptor Accessory Protein Like 2                 | IL1RAPL2 |
| 135 | Interleukin 11                                                  | IL11     |
| 136 | C-X-C Motif Chemokine Receptor 3                                | CXCR3    |
| 137 | C-X-C Motif Chemokine Ligand 12                                 | CXCL12   |
| 138 | Bone Gamma-Carboxyglutamate Protein                             | BGLAP    |
| 139 | CD4 Molecule                                                    | CD4      |
| 140 | Platelet And Endothelial Cell Adhesion Molecule 1               | PECAM1   |
| 141 | Cathepsin K                                                     | CTSK     |
| 142 | Colony Stimulating Factor 3                                     | CSF3     |
| 143 | AKT Serine/Threonine Kinase 1                                   | AKT1     |
| 144 | Inducible T Cell Costimulator Ligand                            | ICOSLG   |
| 145 | Insulin                                                         | INS      |
| 146 | Hypoxia Inducible Factor 1 Subunit Alpha                        | HIF1A    |
| 147 | Interleukin 3                                                   | IL3      |
| 148 | Component Of Inhibitor Of Nuclear Factor Kappa B Kinase Complex | CHUK     |
| 149 | MicroRNA 21                                                     | MIR21    |
| 150 | Matrix Metalloproteinase 13                                     | MMP13    |
| 151 | CD36 Molecule                                                   | CD36     |
| 152 | Cellular Communication Network Factor 2                         | CCN2     |
| 153 | Fc Fragment Of IgG Receptor IIa                                 | FCGR2A   |
| 154 | Lipin 2                                                         | LPIN2    |
| 155 | Serpin Family E Member 1                                        | SERPINE1 |
| 156 | Apolipoprotein E                                                | APOE     |
| 157 | Major Histocompatibility Complex, Class I, A                    | HLA-A    |
| 158 | Mitogen-Activated Protein Kinase 1                              | MAPK1    |
| 159 | C-Type Lectin Domain Containing 7A                              | CLEC7A   |
| 160 | KRAS Proto-Oncogene, GTPase                                     | KRAS     |
| 161 | Membrane Bound Transcription Factor Peptidase, Site 2           | MBTPS2   |
| 162 | Zeta Chain Of T Cell Receptor Associated Protein Kinase 70      | ZAP70    |
| 163 | Caspase 8                                                       | CASP8    |
| 164 | Acid Phosphatase 5, Tartrate Resistant                          | ACP5     |
| 165 | Interleukin 27                                                  | IL27     |
| 166 | SH3 And PX Domains 2B                                           | SH3PXD2B |
| 167 | Interleukin 7                                                   | IL7      |
| 168 | Cathepsin C                                                     | CTSC     |
| 169 | Interleukin 4 Receptor                                          | IL4R     |
| 170 | Selectin L                                                      | SELL     |
| 171 | Interleukin 23 Subunit Alpha                                    | IL23A    |

|     |                                                       |          |
|-----|-------------------------------------------------------|----------|
| 172 | Complement C3d Receptor 2                             | CR2      |
| 173 | Phospholipase A2 Group IVA                            | PLA2G4A  |
| 174 | TRAF3 Interacting Protein 2                           | TRAF3IP2 |
| 175 | Estrogen Receptor 1                                   | ESR1     |
| 176 | C-C Motif Chemokine Receptor 3                        | CCR3     |
| 177 | C-C Motif Chemokine Ligand 18                         | CCL18    |
| 178 | Interleukin 6 Cytokine Family Signal Transducer       | IL6ST    |
| 179 | Caspase Recruitment Domain Family Member 9            | CARD9    |
| 180 | Coagulation Factor II, Thrombin                       | F2       |
| 181 | Glucosylceramidase Beta                               | GBA      |
| 182 | MYC Proto-Oncogene, BHLH Transcription Factor         | MYC      |
| 183 | KIT Proto-Oncogene, Receptor Tyrosine Kinase          | KIT      |
| 184 | Hepatocyte Growth Factor                              | HGF      |
| 185 | Caspase 3                                             | CASP3    |
| 186 | Fc Fragment Of IgG Receptor IIIa                      | FCGR3A   |
| 187 | Myoglobin                                             | MB       |
| 188 | Fos Proto-Oncogene, AP-1 Transcription Factor Subunit | FOS      |
| 189 | Complement C1s                                        | C1S      |
| 190 | Suppressor Of Cytokine Signaling 1                    | SOCS1    |
| 191 | Fc Fragment Of IgG Receptor IIIb                      | FCGR3B   |
| 192 | Collagen Type III Alpha 1 Chain                       | COL3A1   |
| 193 | TNF Receptor Associated Factor 6                      | TRAF6    |
| 194 | Cyclin Dependent Kinase Inhibitor 1A                  | CDKN1A   |
| 195 | Heat Shock Protein Family D (Hsp60) Member 1          | HSPD1    |
| 196 | Sodium Voltage-Gated Channel Alpha Subunit 9          | SCN9A    |
| 197 | Discoidin Domain Receptor Tyrosine Kinase 2           | DDR2     |
| 198 | Protein Tyrosine Phosphatase Receptor Type C          | PTPRC    |
| 199 | Methylenetetrahydrofolate Reductase                   | MTHFR    |
| 200 | Integrin Subunit Alpha L                              | ITGAL    |
| 201 | Suppressor Of Cytokine Signaling 3                    | SOCS3    |
| 202 | CAMP Responsive Element Binding Protein 1             | CREB1    |
| 203 | Fibroblast Growth Factor 2                            | FGF2     |
| 204 | Angiotensin I Converting Enzyme                       | ACE      |
| 205 | TNFAIP3 Interacting Protein 1                         | TNIP1    |
| 206 | Secretory Leukocyte Peptidase Inhibitor               | SLPI     |
| 207 | CD80 Molecule                                         | CD80     |
| 208 | Capping Protein Regulator And Myosin 1 Linker 2       | CARMIL2  |
| 209 | Cathelicidin Antimicrobial Peptide                    | CAMP     |
| 210 | Mannose Binding Lectin 2                              | MBL2     |
| 211 | MicroRNA 223                                          | MIR223   |
| 212 | RB Transcriptional Corepressor 1                      | RB1      |
| 213 | Gap Junction Protein Beta 2                           | GJB2     |
| 214 | Cyclin D1                                             | CCND1    |
| 215 | Serpin Family A Member 3                              | SERPINA3 |

|     |                                                                        |         |
|-----|------------------------------------------------------------------------|---------|
| 216 | Transforming Growth Factor Beta Receptor 2                             | TGFBR2  |
| 217 | Insulin Like Growth Factor 1                                           | IGF1    |
| 218 | Colony Stimulating Factor 1 Receptor                                   | CSF1R   |
| 219 | Collagen Type I Alpha 1 Chain                                          | COL1A1  |
| 220 | CD8a Molecule                                                          | CD8A    |
| 221 | Cytochrome C Oxidase Subunit 5A                                        | COX5A   |
| 222 | PYD And CARD Domain Containing                                         | PYCARD  |
| 223 | CD79a Molecule                                                         | CD79A   |
| 224 | Interleukin 33                                                         | IL33    |
| 225 | Advanced Glycosylation End-Product Specific Receptor                   | AGER    |
| 226 | Thrombospondin 1                                                       | THBS1   |
| 227 | Epidermal Growth Factor                                                | EGF     |
| 228 | Solute Carrier Organic Anion Transporter Family Member 2A1             | SLCO2A1 |
| 229 | GNAS Complex Locus                                                     | GNAS    |
| 230 | IL2 Inducible T Cell Kinase                                            | ITK     |
| 231 | Interferon Alpha 1                                                     | IFNA1   |
| 232 | BCL2 Apoptosis Regulator                                               | BCL2    |
| 233 | Interleukin 17 Receptor A                                              | IL17RA  |
| 234 | Phosphatidylinositol-4,5-Bisphosphate 3-Kinase Catalytic Subunit Alpha | PIK3CA  |
| 235 | Prostaglandin E Receptor 4                                             | PTGER4  |
| 236 | Ghrelin And Obestatin Prepropeptide                                    | GHRL    |
| 237 | Kininogen 1                                                            | KNG1    |
| 238 | Interleukin 9                                                          | IL9     |
| 239 | Transient Receptor Potential Cation Channel Subfamily V Member 1       | TRPV1   |
| 240 | Notch Receptor 1                                                       | NOTCH1  |
| 241 | C-C Motif Chemokine Ligand 17                                          | CCL17   |
| 242 | Bruton Tyrosine Kinase                                                 | BTK     |
| 243 | Prostaglandin E Synthase                                               | PTGES   |
| 244 | Cathepsin G                                                            | CTSG    |
| 245 | Bone Morphogenetic Protein 6                                           | BMP6    |
| 246 | Complement C4B (Chido Blood Group)                                     | C4B     |
| 247 | Parathyroid Hormone Like Hormone                                       | PTH1H   |
| 248 | CD86 Molecule                                                          | CD86    |
| 249 | CD34 Molecule                                                          | CD34    |
| 250 | LIF Interleukin 6 Family Cytokine                                      | LIF     |
| 251 | DEXD/H-Box Helicase 58                                                 | DDX58   |
| 252 | Erythropoietin                                                         | EPO     |
| 253 | Actin Alpha Cardiac Muscle 1                                           | ACTC1   |
| 254 | Neurofibromin 1                                                        | NF1     |
| 255 | Ceruloplasmin                                                          | CP      |
| 256 | Fibrillin 1                                                            | FBN1    |
| 257 | Valosin Containing Protein                                             | VCP     |

|     |                                                                                 |         |
|-----|---------------------------------------------------------------------------------|---------|
| 258 | CCAAT Enhancer Binding Protein Beta                                             | CEBPB   |
| 259 | Erb-B2 Receptor Tyrosine Kinase 2                                               | ERBB2   |
| 260 | Signal Transducer And Activator Of Transcription 6                              | STAT6   |
| 261 | MicroRNA 126                                                                    | MIR126  |
| 262 | Reticulophagy Regulator 1                                                       | RETREG1 |
| 263 | Heat Shock Protein Family A (Hsp70) Member 4                                    | HSPA4   |
| 264 | Coagulation Factor II Thrombin Receptor                                         | F2R     |
| 265 | Solute Carrier Family 29 Member 3                                               | SLC29A3 |
| 266 | RUNX Family Transcription Factor 2                                              | RUNX2   |
| 267 | Phosphatase And Tensin Homolog                                                  | PTEN    |
| 268 | Cathepsin B                                                                     | CTSB    |
| 269 | SAM And HD Domain Containing Deoxynucleoside Triphosphate Triphosphohydrolase 1 | SAMHD1  |
| 270 | Lymphatic Vessel Endothelial Hyaluronan Receptor 1                              | LYVE1   |
| 271 | Adaptor Related Protein Complex 1 Subunit Sigma 3                               | AP1S3   |
| 272 | Hydroxysteroid 11-Beta Dehydrogenase 1                                          | HSD11B1 |
| 273 | Vasoactive Intestinal Peptide                                                   | VIP     |
| 274 | Beta-2-Microglobulin                                                            | B2M     |
| 275 | Sirtuin 1                                                                       | SIRT1   |
| 276 | Nerve Growth Factor                                                             | NGF     |
| 277 | Caveolin 1                                                                      | CAV1    |
| 278 | MDM2 Proto-Oncogene                                                             | MDM2    |
| 279 | Transforming Growth Factor Beta Receptor 1                                      | TGFBR1  |
| 280 | Cyclin Dependent Kinase Inhibitor 1B                                            | CDKN1B  |
| 281 | CD68 Molecule                                                                   | CD68    |
| 282 | Vimentin                                                                        | VIM     |
| 283 | Tachykinin Precursor 1                                                          | TAC1    |
| 284 | CD44 Molecule (Indian Blood Group)                                              | CD44    |
| 285 | Glucuronidase Beta                                                              | GUSB    |
| 286 | Parathyroid Hormone                                                             | PTH     |
| 287 | Checkpoint Kinase 2                                                             | CHEK2   |
| 288 | Oncostatin M                                                                    | OSM     |
| 289 | Lamin B Receptor                                                                | LBR     |
| 290 | Granzyme B                                                                      | GZMB    |
| 291 | GATA Binding Protein 1                                                          | GATA1   |
| 292 | CD69 Molecule                                                                   | CD69    |
| 293 | TIMP Metalloproteinase Inhibitor 2                                              | TIMP2   |
| 294 | Brain Derived Neurotrophic Factor                                               | BDNF    |
| 295 | Proteoglycan 4                                                                  | PRG4    |
| 296 | Metastasis Associated Lung Adenocarcinoma Transcript 1                          | MALAT1  |
| 297 | Recombination Activating 1                                                      | RAG1    |
| 298 | Ret Proto-Oncogene                                                              | RET     |
| 299 | Interferon Alpha 2                                                              | IFNA2   |
| 300 | Proopiomelanocortin                                                             | POMC    |

|     |                                                                          |          |
|-----|--------------------------------------------------------------------------|----------|
| 301 | Uroporphyrinogen III Synthase                                            | UROS     |
| 302 | MET Proto-Oncogene, Receptor Tyrosine Kinase                             | MET      |
| 303 | Fibroblast Growth Factor Receptor 1                                      | FGFR1    |
| 304 | MHC Class I Polypeptide-Related Sequence A                               | MICA     |
| 305 | Recombination Activating 2                                               | RAG2     |
| 306 | Elastin                                                                  | ELN      |
| 307 | ATM Serine/Threonine Kinase                                              | ATM      |
| 308 | C-C Motif Chemokine Ligand 27                                            | CCL27    |
| 309 | Proteasome 20S Subunit Beta 9                                            | PSMB9    |
| 310 | BCL2 Like 1                                                              | BCL2L1   |
| 311 | SRC Proto-Oncogene, Non-Receptor Tyrosine Kinase                         | SRC      |
| 312 | ANTXR Cell Adhesion Molecule 2                                           | ANTXR2   |
| 313 | Phosphatidylinositol-4-Phosphate 3-Kinase Catalytic Subunit Type 2 Alpha | PIK3C2A  |
| 314 | ATPase Copper Transporting Alpha                                         | ATP7A    |
| 315 | REL Proto-Oncogene, NF-KB Subunit                                        | REL      |
| 316 | Secreted Protein Acidic And Cysteine Rich                                | SPARC    |
| 317 | Keratin 14                                                               | KRT14    |
| 318 | C-C Motif Chemokine Receptor 4                                           | CCR4     |
| 319 | X-Box Binding Protein 1                                                  | XBP1     |
| 320 | Heterogeneous Nuclear Ribonucleoprotein A1                               | HNRNPA1  |
| 321 | Vascular Endothelial Growth Factor C                                     | VEGFC    |
| 322 | Endothelin 1                                                             | EDN1     |
| 323 | Purinergic Receptor P2X 7                                                | P2RX7    |
| 324 | Leucine Rich Repeat Kinase 2                                             | LRRK2    |
| 325 | Matrix Metalloproteinase 7                                               | MMP7     |
| 326 | Chromogranin A                                                           | CHGA     |
| 327 | Nicotinamide Phosphoribosyltransferase                                   | NAMPT    |
| 328 | Fibroblast Growth Factor 7                                               | FGF7     |
| 329 | Rac Family Small GTPase 1                                                | RAC1     |
| 330 | Serpin Family A Member 1                                                 | SERPINA1 |
| 331 | Amphiregulin                                                             | AREG     |
| 332 | Fms Related Receptor Tyrosine Kinase 4                                   | FLT4     |
| 333 | Cyclin Dependent Kinase 4                                                | CDK4     |
| 334 | Interleukin 1 Receptor Like 2                                            | IL1RL2   |
| 335 | Growth Factor Independent 1 Transcriptional Repressor                    | GFI1     |
| 336 | SMAD Family Member 3                                                     | SMAD3    |
| 337 | Hemopexin                                                                | HPX      |
| 338 | SMAD Family Member 7                                                     | SMAD7    |
| 339 | Parathyroid Hormone 1 Receptor                                           | PTH1R    |
| 340 | Transferrin Receptor                                                     | TFRC     |
| 341 | Kelch Domain Containing 8B                                               | KLHDC8B  |
| 342 | C-C Motif Chemokine Ligand 15                                            | CCL15    |
| 343 | Keratin 10                                                               | KRT10    |



|     |                                                                       |           |
|-----|-----------------------------------------------------------------------|-----------|
| 344 | Fibroblast Growth Factor 1                                            | FGF1      |
| 345 | Superoxide Dismutase 2                                                | SOD2      |
| 346 | TEK Receptor Tyrosine Kinase                                          | TEK       |
| 347 | Gap Junction Protein Beta 6                                           | GJB6      |
| 348 | Plasminogen Activator, Urokinase                                      | PLAU      |
| 349 | H2A Clustered Histone 18                                              | H2AC18    |
| 350 | Secretin                                                              | SCT       |
| 351 | Toll Like Receptor 8                                                  | TLR8      |
| 352 | Desmin                                                                | DES       |
| 353 | Procollagen-Lysine,2-Oxoglutarate 5-Dioxygenase 1                     | PLOD1     |
| 354 | NADH:Ubiquinone Oxidoreductase Complex Assembly Factor 3              | NDUFAF3   |
| 355 | Vasodilator Stimulated Phosphoprotein                                 | VASP      |
| 356 | Cannabinoid Receptor 2                                                | CNR2      |
| 357 | Cyclin Dependent Kinase Inhibitor 2A                                  | CDKN2A    |
| 358 | TNF Receptor Superfamily Member 10a                                   | TNFRSF10A |
| 359 | RAB11 Binding And LisH Domain, Coiled-Coil And HEAT Repeat Containing | RELCH     |
| 360 | TNF Superfamily Member 10                                             | TNFSF10   |
| 361 | C-X-C Motif Chemokine Ligand 13                                       | CXCL13    |
| 362 | CD209 Molecule                                                        | CD209     |
| 363 | MicroRNA 17                                                           | MIR17     |
| 364 | SH2 Domain Containing 1A                                              | SH2D1A    |
| 365 | Intelectin 1                                                          | ITLN1     |
| 366 | Matrix Metalloproteinase 8                                            | MMP8      |
| 367 | Synuclein Alpha                                                       | SNCA      |
| 368 | Cytochrome C, Somatic                                                 | CYCS      |
| 369 | Galectin 3                                                            | LGALS3    |
| 370 | TNF Superfamily Member 13b                                            | TNFSF13B  |
| 371 | Cell Adhesion Associated, Oncogene Regulated                          | CDON      |
| 372 | MicroRNA 140                                                          | MIR140    |
| 373 | KIT Ligand                                                            | KITLG     |
| 374 | Transferrin                                                           | TF        |
| 375 | Lysine Demethylase 4C                                                 | KDM4C     |
| 376 | Menin 1                                                               | MEN1      |
| 377 | Lamin B1                                                              | LMNB1     |
| 378 | ETS Proto-Oncogene 1, Transcription Factor                            | ETS1      |
| 379 | Isocitrate Dehydrogenase (NADP(+)) 1                                  | IDH1      |
| 380 | Prostaglandin E Receptor 2                                            | PTGER2    |
| 381 | Toll Like Receptor 7                                                  | TLR7      |
| 382 | Mitogen-Activated Protein Kinase 3                                    | MAPK3     |
| 383 | Annexin A5                                                            | ANXA5     |
| 384 | TNF Receptor Associated Factor 2                                      | TRAF2     |
| 385 | Marker Of Proliferation Ki-67                                         | MKI67     |
| 386 | Angiopoietin 2                                                        | ANGPT2    |

|     |                                                                        |           |
|-----|------------------------------------------------------------------------|-----------|
| 387 | Plasminogen Activator, Urokinase Receptor                              | PLAUR     |
| 388 | TNF Superfamily Member 12                                              | TNFSF12   |
| 389 | ATP Binding Cassette Subfamily C Member 1                              | ABCC1     |
| 390 | MicroRNA 22                                                            | MIR22     |
| 391 | Alpha Glucosidase                                                      | GAA       |
| 392 | Recombination Signal Binding Protein For Immunoglobulin Kappa J Region | RBPJ      |
| 393 | Collagen Type II Alpha 1 Chain                                         | COL2A1    |
| 394 | Podoplanin                                                             | PDPN      |
| 395 | Glucagon                                                               | GCG       |
| 396 | Fibroblast Growth Factor Receptor 3                                    | FGFR3     |
| 397 | C-C Motif Chemokine Receptor 7                                         | CCR7      |
| 398 | Heterogeneous Nuclear Ribonucleoprotein A2/B1                          | HNRNPA2B1 |
| 399 | Heat Shock Protein 90 Alpha Family Class A Member 1                    | HSP90AA1  |
| 400 | Deoxyhypusine Hydroxylase                                              | DOHH      |
| 401 | Adenylate Cyclase 10                                                   | ADCY10    |
| 402 | Ferredoxin 1                                                           | FDX1      |
| 403 | Interleukin 12 Receptor Subunit Beta 1                                 | IL12RB1   |
| 404 | Interferon Gamma Receptor 1                                            | IFNGR1    |
| 405 | Gap Junction Protein Alpha 1                                           | GJA1      |
| 406 | ADAM Metallopeptidase With Thrombospondin Type 1 Motif 4               | ADAMTS4   |
| 407 | Apolipoprotein H                                                       | APOH      |
| 408 | Mitogen-Activated Protein Kinase Kinase Kinase 7                       | MAP3K7    |
| 409 | Tet Methylcytosine Dioxygenase 2                                       | TET2      |
| 410 | Cyclin Dependent Kinase Inhibitor 2B                                   | CDKN2B    |
| 411 | TNF Receptor Superfamily Member 6b                                     | TNFRSF6B  |
| 412 | Semaphorin 4D                                                          | SEMA4D    |
| 413 | Gamma-Glutamyltransferase 1                                            | GGT1      |
| 414 | Nuclear Factor Kappa B Subunit 2                                       | NFKB2     |
| 415 | Signal Transducer And Activator Of Transcription 5B                    | STAT5B    |
| 416 | Baculoviral IAP Repeat Containing 2                                    | BIRC2     |
| 417 | Transient Receptor Potential Cation Channel Subfamily V Member 4       | TRPV4     |
| 418 | Signal Transducer And Activator Of Transcription 5A                    | STAT5A    |
| 419 | Homeostatic Iron Regulator                                             | HFE       |
| 420 | AT-Rich Interaction Domain 1B                                          | ARID1B    |
| 421 | Heat Shock Protein Family A (Hsp70) Member 1A                          | HSPA1A    |
| 422 | Glutathione S-Transferase Mu 1                                         | GSTM1     |
| 423 | Integrin Subunit Beta 1                                                | ITGB1     |
| 424 | Uroporphyrinogen Decarboxylase                                         | UROD      |
| 425 | Adaptor Related Protein Complex 4 Subunit Mu 1                         | AP4M1     |
| 426 | Small EDRK-Rich Factor 1A                                              | SERF1A    |
| 427 | Small EDRK-Rich Factor 1B                                              | SERF1B    |
| 428 | Zinc Finger E-Box Binding Homeobox 1                                   | ZEB1      |

|     |                                                          |              |
|-----|----------------------------------------------------------|--------------|
| 429 | CASP8 And FADD Like Apoptosis Regulator                  | CFLAR        |
| 430 | Jagged Canonical Notch Ligand 1                          | JAG1         |
| 431 | Insulin Like Growth Factor 1 Receptor                    | IGF1R        |
| 432 | Aggrecan                                                 | ACAN         |
| 433 | Heparanase                                               | HPSE         |
| 434 | WNK Lysine Deficient Protein Kinase 1                    | WNK1         |
| 435 | TNF Receptor Superfamily Member 8                        | TNFRSF8      |
| 436 | Bone Morphogenetic Protein 2                             | BMP2         |
| 437 | Phosphoinositide-3-Kinase Regulatory Subunit 1           | PIK3R1       |
| 438 | Mannose Receptor C-Type 1                                | MRC1         |
| 439 | Retinol Binding Protein 4                                | RBP4         |
| 440 | Renin                                                    | REN          |
| 441 | B-Raf Proto-Oncogene, Serine/Threonine Kinase            | BRAF         |
| 442 | Scavenger Receptor Class B Member 2                      | SCARB2       |
| 443 | BCL2 Associated X, Apoptosis Regulator                   | BAX          |
| 444 | Isocitrate Dehydrogenase (NADP(+)) 2                     | IDH2         |
| 445 | Insulin Like Growth Factor Binding Protein 3             | IGFBP3       |
| 446 | Proteasome Maturation Protein                            | POMP         |
| 447 | Ras Homolog Family Member A                              | RHOA         |
| 448 | Cytochrome P450 Family 19 Subfamily A Member 1           | CYP19A1      |
| 449 | Parkinsonism Associated Deglycase                        | PARK7        |
| 450 | NOC2 Like Nucleolar Associated Transcriptional Repressor | NOC2L        |
| 451 | Matrix Metalloproteinase 12                              | MMP12        |
| 452 | CD1a Molecule                                            | CD1A         |
| 453 | MN1 Proto-Oncogene, Transcriptional Regulator            | MN1          |
| 454 | Ectodysplasin A Receptor                                 | EDAR         |
| 455 | MicroRNA 30a                                             | MIR30A       |
| 456 | Neural Cell Adhesion Molecule 1                          | NCAM1        |
| 457 | Cytochrome P450 Family 3 Subfamily A Member 4            | CYP3A4       |
| 458 | Neurotrophic Receptor Tyrosine Kinase 1                  | NTRK1        |
| 459 | Cytochrome B5 Type A                                     | CYB5A        |
| 460 | RAB6B, Member RAS Oncogene Family                        | RAB6B        |
| 461 | F-Box And Leucine Rich Repeat Protein 5                  | FBXL5        |
| 462 | T Cell Receptor Beta Locus                               | TRB          |
| 463 | Somatostatin                                             | SST          |
| 464 | Cytochrome P450 Family 2 Subfamily C Member 19           | CYP2C19      |
| 465 | MicroRNA 20a                                             | MIR20A       |
| 466 | CD2 Molecule                                             | CD2          |
| 467 | Delta Like Canonical Notch Ligand 1                      | DLL1         |
| 468 | CD19 Molecule                                            | CD19         |
| 469 | Serpin Family H Member 1                                 | SERPINH1     |
| 470 | GBA Recombination Region                                 | LOC106627981 |
| 471 | Lysyl Oxidase                                            | LOX          |
| 472 | Mannosidase Alpha Class 2B Member 1                      | MAN2B1       |

|     |                                                                  |          |
|-----|------------------------------------------------------------------|----------|
| 473 | Sialic Acid Binding Ig Like Lectin 5                             | SIGLEC5  |
| 474 | Interleukin 1 Receptor Accessory Protein                         | IL1RAP   |
| 475 | Signaling Lymphocytic Activation Molecule Family Member 1        | SLAMF1   |
| 476 | Transient Receptor Potential Cation Channel Subfamily A Member 1 | TRPA1    |
| 477 | Kruppel Like Factor 4                                            | KLF4     |
| 478 | RUNX Family Transcription Factor 1                               | RUNX1    |
| 479 | Activin A Receptor Like Type 1                                   | ACVRL1   |
| 480 | Zinc Finger And BTB Domain Containing 20                         | ZBTB20   |
| 481 | Bone Morphogenetic Protein 7                                     | BMP7     |
| 482 | Growth Arrest Specific 5                                         | GAS5     |
| 483 | ADAMTS Like 1                                                    | ADAMTSL1 |
| 484 | Elongator Acetyltransferase Complex Subunit 1                    | ELP1     |
| 485 | Cyclin Dependent Kinase Inhibitor 2C                             | CDKN2C   |
| 486 | Ectodysplasin A                                                  | EDA      |
| 487 | Transforming Growth Factor Alpha                                 | TGFA     |
| 488 | B Cell Scaffold Protein With Ankyrin Repeats 1                   | BANK1    |
| 489 | Caspase 9                                                        | CASP9    |
| 490 | Peptidyl Arginine Deiminase 4                                    | PADI4    |
| 491 | Poly(ADP-Ribose) Polymerase 1                                    | PARP1    |
| 492 | MutS Homolog 6                                                   | MSH6     |
| 493 | Transient Receptor Potential Cation Channel Subfamily V Member 3 | TRPV3    |
| 494 | N-Acylsphingosine Amidohydrolase 1                               | ASAH1    |
| 495 | Mitogen-Activated Protein Kinase Kinase 1                        | MAP2K1   |
| 496 | Ectonucleotide Pyrophosphatase/Phosphodiesterase 1               | ENPP1    |
| 497 | Bone Morphogenetic Protein 4                                     | BMP4     |
| 498 | Cartilage Oligomeric Matrix Protein                              | COMP     |
| 499 | Forkhead Box O1                                                  | FOXO1    |
| 500 | Prolactin                                                        | PRL      |
| 501 | Eukaryotic Translation Initiation Factor 1A Domain Containing    | EIF1AD   |
| 502 | Transient Receptor Potential Cation Channel Subfamily M Member 4 | TRPM4    |
| 503 | Sphingomyelin Phosphodiesterase 1                                | SMPD1    |
| 504 | Exostosin Glycosyltransferase 2                                  | EXT2     |
| 505 | Ribosomal Protein S27a                                           | RPS27A   |
| 506 | Emerin                                                           | EMD      |
| 507 | Centrosomal Protein 57                                           | CEP57    |
| 508 | BUB1 Mitotic Checkpoint Serine/Threonine Kinase B                | BUB1B    |
| 509 | Interleukin 17C                                                  | IL17C    |
| 510 | Kinase Insert Domain Receptor                                    | KDR      |
| 511 | Cyclic GMP-AMP Synthase                                          | CGAS     |
| 512 | ADAM Metallopeptidase With Thrombospondin Type 1 Motif 3         | ADAMTS3  |
| 513 | Exostosin Glycosyltransferase 1                                  | EXT1     |

|     |                                                                |          |
|-----|----------------------------------------------------------------|----------|
| 514 | P53 Apoptosis Effector Related To PMP22                        | PERP     |
| 515 | Low Density Lipoprotein Receptor                               | LDLR     |
| 516 | Inducible T Cell Costimulator                                  | ICOS     |
| 517 | Serine Protease 1                                              | PRSS1    |
| 518 | Hes Related Family BHLH Transcription Factor With YRPW Motif 2 | HEY2     |
| 519 | Mitogen-Activated Protein Kinase 10                            | MAPK10   |
| 520 | Adaptor Related Protein Complex 1 Subunit Beta 1               | AP1B1    |
| 521 | MicroRNA 27a                                                   | MIR27A   |
| 522 | Coproporphyrinogen Oxidase                                     | CPOX     |
| 523 | Solute Carrier Family 17 Member 5                              | SLC17A5  |
| 524 | EGFR Antisense RNA 1                                           | EGFR-AS1 |
| 525 | MicroRNA 15a                                                   | MIR15A   |
| 526 | Kallikrein Related Peptidase 3                                 | KLK3     |
| 527 | Myosin Heavy Chain 11                                          | MYH11    |
| 528 | S100 Calcium Binding Protein A7                                | S100A7   |
| 529 | Prostaglandin E Receptor 1                                     | PTGER1   |
| 530 | Platelet Derived Growth Factor Subunit B                       | PDGFB    |
| 531 | CD58 Molecule                                                  | CD58     |
| 532 | Tenascin XB                                                    | TNXB     |
| 533 | Filamin A                                                      | FLNA     |
| 534 | BUB1 Mitotic Checkpoint Serine/Threonine Kinase                | BUB1     |
| 535 | Rho Associated Coiled-Coil Containing Protein Kinase 1         | ROCK1    |
| 536 | Nuclear Receptor Subfamily 5 Group A Member 2                  | NR5A2    |
| 537 | Unc-45 Myosin Chaperone B                                      | UNC45B   |
| 538 | ERCC Excision Repair 1, Endonuclease Non-Catalytic Subunit     | ERCC1    |
| 539 | Platelet Derived Growth Factor Subunit A                       | PDGFA    |
| 540 | ELAV Like RNA Binding Protein 1                                | ELAVL1   |
| 541 | Fibroblast Growth Factor Receptor 2                            | FGFR2    |
| 542 | Cathepsin L                                                    | CTSL     |
| 543 | CD38 Molecule                                                  | CD38     |
| 544 | Protein Tyrosine Phosphatase Non-Receptor Type 11              | PTPN11   |
| 545 | Serpin Family B Member 5                                       | SERPINB5 |
| 546 | Collagen Type V Alpha 1 Chain                                  | COL5A1   |
| 547 | Atypical Chemokine Receptor 1 (Duffy Blood Group)              | ACKR1    |
| 548 | Hepcidin Antimicrobial Peptide                                 | HAMP     |
| 549 | Apolipoprotein B                                               | APOB     |
| 550 | MAPK Associated Protein 1                                      | MAPKAP1  |
| 551 | Protein Tyrosine Kinase 2 Beta                                 | PTK2B    |
| 552 | MAGE Family Member F1                                          | MAGEF1   |
| 553 | Chymase 1                                                      | CMA1     |
| 554 | Transglutaminase 1                                             | TGM1     |
| 555 | Heat Shock Protein Family A (Hsp70) Member 5                   | HSPA5    |
| 556 | ASXL Transcriptional Regulator 1                               | ASXL1    |

|     |                                                                             |         |
|-----|-----------------------------------------------------------------------------|---------|
| 557 | Prosaposin                                                                  | PSAP    |
| 558 | Interleukin 34                                                              | IL34    |
| 559 | Neurotrophic Receptor Tyrosine Kinase 3                                     | NTRK3   |
| 560 | T Cell Immune Regulator 1, ATPase H <sup>+</sup> Transporting V0 Subunit A3 | TCIRG1  |
| 561 | Interferon Lambda 1                                                         | IFNL1   |
| 562 | Hes Related Family BHLH Transcription Factor With YRPW Motif Like           | HEYL    |
| 563 | Cytochrome P450 Family 1 Subfamily A Member 2                               | CYP1A2  |
| 564 | Alkaline Phosphatase, Placental                                             | ALPP    |
| 565 | MicroRNA 16-1                                                               | MIR16-1 |
| 566 | Cell Division Cycle 73                                                      | CDC73   |
| 567 | Cytochrome P450 Family 2 Subfamily E Member 1                               | CYP2E1  |
| 568 | Prohibitin                                                                  | PHB     |
| 569 | Cytochrome P450 Family 1 Subfamily A Member 1                               | CYP1A1  |
| 570 | Nuclear Factor Of Activated T Cells 1                                       | NFATC1  |
| 571 | BUB3 Mitotic Checkpoint Protein                                             | BUB3    |
| 572 | Chitinase Acidic                                                            | CHIA    |
| 573 | Nuclear Paraspeckle Assembly Transcript 1                                   | NEAT1   |
| 574 | Prostaglandin E Receptor 3                                                  | PTGER3  |
| 575 | SRY-Box Transcription Factor 2                                              | SOX2    |
| 576 | Leptin, Serum Levels Of                                                     | LEPQTL1 |
| 577 | Syndecan 1                                                                  | SDC1    |
| 578 | CDK5 Regulatory Subunit Associated Protein 1 Like 1                         | CDKAL1  |
| 579 | Integrin Subunit Alpha 6                                                    | ITGA6   |
| 580 | Cbl Proto-Oncogene                                                          | CBL     |
| 581 | Ectonucleotide Pyrophosphatase/Phosphodiesterase 3                          | ENPP3   |
| 582 | ERCC Excision Repair 6, Chromatin Remodeling Factor                         | ERCC6   |
| 583 | MicroRNA 200a                                                               | MIR200A |
| 584 | Protein Kinase, DNA-Activated, Catalytic Subunit                            | PRKDC   |
| 585 | Adenosine A2b Receptor                                                      | ADORA2B |
| 586 | Sclerostin                                                                  | SOST    |
| 587 | Hes Family BHLH Transcription Factor 7                                      | HES7    |
| 588 | Lipopolysaccharide Induced TNF Factor                                       | LITAF   |
| 589 | MicroRNA 335                                                                | MIR335  |
| 590 | Frizzled Related Protein                                                    | FRZB    |
| 591 | Caspase Recruitment Domain Family Member 16                                 | CARD16  |
| 592 | Glutamate Ionotropic Receptor NMDA Type Subunit 2B                          | GRIN2B  |
| 593 | Protein Kinase CAMP-Dependent Type I Regulatory Subunit Alpha               | PRKAR1A |
| 594 | Peptidylprolyl Isomerase G                                                  | PPIG    |
| 595 | Insulin Like Growth Factor 2                                                | IGF2    |
| 596 | Actin Alpha 2, Smooth Muscle                                                | ACTA2   |
| 597 | Integrin Subunit Beta 3                                                     | ITGB3   |

|     |                                                                                                    |            |
|-----|----------------------------------------------------------------------------------------------------|------------|
| 598 | Jagged Canonical Notch Ligand 2                                                                    | JAG2       |
| 599 | Atlastin GTPase 3                                                                                  | ATL3       |
| 600 | H19 Imprinted Maternally Expressed Transcript                                                      | H19        |
| 601 | Chitinase 1                                                                                        | CHIT1      |
| 602 | CDKN2B Antisense RNA 1                                                                             | CDKN2B-AS1 |
| 603 | Integrin Subunit Alpha V                                                                           | ITGAV      |
| 604 | TNF Superfamily Member 14                                                                          | TNFSF14    |
| 605 | Caldesmon 1                                                                                        | CALD1      |
| 606 | Cathepsin D                                                                                        | CTSD       |
| 607 | Basigin (Ok Blood Group)                                                                           | BSG        |
| 608 | Methylenetetrahydrofolate Dehydrogenase, Cyclohydrolase And<br>Formyltetrahydrofolate Synthetase 1 | MTHFD1     |
| 609 | Growth Hormone 1                                                                                   | GH1        |
| 610 | TAR DNA Binding Protein                                                                            | TARDBP     |
| 611 | Factor Interacting With PAPOLA And CPSF1                                                           | FIP1L1     |
| 612 | RANBP2-Type And C3HC4-Type Zinc Finger Containing 1                                                | RBCK1      |
| 613 | Serpin Family F Member 1                                                                           | SERPINF1   |
| 614 | Lamin B2                                                                                           | LMNB2      |
| 615 | ADAM Metallopeptidase With Thrombospondin Type 1 Motif 2                                           | ADAMTS2    |
| 616 | Loricrin Cornified Envelope Precursor Protein                                                      | LORICRIN   |
| 617 | MutY DNA Glycosylase                                                                               | MUTYH      |
| 618 | Maternally Expressed 3                                                                             | MEG3       |
| 619 | Apolipoprotein D                                                                                   | APOD       |
| 620 | Calcium Sensing Receptor                                                                           | CASR       |
| 621 | Cystatin E/M                                                                                       | CST6       |
| 622 | Sphingosine-1-Phosphate Receptor 1                                                                 | S1PR1      |
| 623 | Thrombospondin 3                                                                                   | THBS3      |
| 624 | Sterol Regulatory Element Binding Transcription Factor 2                                           | SREBF2     |
| 625 | Spectrin Repeat Containing Nuclear Envelope Protein 2                                              | SYNE2      |
| 626 | Membrane Spanning 4-Domains A1                                                                     | MS4A1      |
| 627 | Hyaluronan Synthase 1                                                                              | HAS1       |
| 628 | Serine And Arginine Rich Splicing Factor 2                                                         | SRSF2      |
| 629 | Survival Of Motor Neuron 1, Telomeric                                                              | SMN1       |
| 630 | CD1e Molecule                                                                                      | CD1E       |
| 631 | Integrin Subunit Alpha 2                                                                           | ITGA2      |
| 632 | TNF Receptor Superfamily Member 13B                                                                | TNFRSF13B  |
| 633 | CD47 Molecule                                                                                      | CD47       |
| 634 | ATRX Chromatin Remodeler                                                                           | ATRX       |
| 635 | ERCC Excision Repair 4, Endonuclease Catalytic Subunit                                             | ERCC4      |
| 636 | C-Type Lectin Domain Containing 5A                                                                 | CLEC5A     |
| 637 | PAXIP1 Associated Glutamate Rich Protein 1                                                         | PAGR1      |
| 638 | Collagen Type V Alpha 2 Chain                                                                      | COL5A2     |
| 639 | Transportin 1                                                                                      | TNPO1      |
| 640 | Coagulation Factor IX                                                                              | F9         |

|     |                                                                  |           |
|-----|------------------------------------------------------------------|-----------|
| 641 | Matrix Metallopeptidase 10                                       | MMP10     |
| 642 | Macrophage Stimulating 1 Receptor                                | MST1R     |
| 643 | FKBP Prolyl Isomerase 14                                         | FKBP14    |
| 644 | Sirtuin 6                                                        | SIRT6     |
| 645 | TNF Receptor Associated Factor 1                                 | TRAF1     |
| 646 | Transient Receptor Potential Cation Channel Subfamily V Member 2 | TRPV2     |
| 647 | ADAM Metallopeptidase With Thrombospondin Type 1 Motif 13        | ADAMTS13  |
| 648 | Ezrin                                                            | EZR       |
| 649 | Inhibin Subunit Beta A                                           | INHBA     |
| 650 | Cytochrome P450 Family 3 Subfamily A Member 5                    | CYP3A5    |
| 651 | Interferon Regulatory Factor 4                                   | IRF4      |
| 652 | MicroRNA 9-1                                                     | MIR9-1    |
| 653 | SRY-Box Transcription Factor 4                                   | SOX4      |
| 654 | Solute Carrier Family 6 Member 19                                | SLC6A19   |
| 655 | Fibulin 5                                                        | FBLN5     |
| 656 | EGF Containing Fibulin Extracellular Matrix Protein 2            | EFEMP2    |
| 657 | Spi-1 Proto-Oncogene                                             | SPI1      |
| 658 | CD1d Molecule                                                    | CD1D      |
| 659 | XPA, DNA Damage Recognition And Repair Factor                    | XPA       |
| 660 | Thymidine Phosphorylase                                          | TYMP      |
| 661 | Sonic Hedgehog Signaling Molecule                                | SHH       |
| 662 | Transducin Beta Like 1 X-Linked                                  | TBL1X     |
| 663 | MicroRNA 143                                                     | MIR143    |
| 664 | Hyaluronan Synthase 2                                            | HAS2      |
| 665 | Choline Kinase Alpha                                             | CHKA      |
| 666 | Dickkopf WNT Signaling Pathway Inhibitor 1                       | DKK1      |
| 667 | H2A.X Variant Histone                                            | H2AX      |
| 668 | TNF Superfamily Member 8                                         | TNFSF8    |
| 669 | B Cell Linker                                                    | BLNK      |
| 670 | ERCC Excision Repair 8, CSA Ubiquitin Ligase Complex Subunit     | ERCC8     |
| 671 | BCL6 Transcription Repressor                                     | BCL6      |
| 672 | Decorin                                                          | DCN       |
| 673 | Ganglioside Induced Differentiation Associated Protein 1         | GDAP1     |
| 674 | ERCC Excision Repair 2, TFIIH Core Complex Helicase Subunit      | ERCC2     |
| 675 | Hematopoietic Prostaglandin D Synthase                           | HPGDS     |
| 676 | Succinate Dehydrogenase Complex Iron Sulfur Subunit B            | SDHB      |
| 677 | Periostin                                                        | POSTN     |
| 678 | TXK Tyrosine Kinase                                              | TXK       |
| 679 | Cortactin                                                        | CTTN      |
| 680 | Lymphocyte Antigen 75                                            | LY75      |
| 681 | ADAM Metallopeptidase Domain 12                                  | ADAM12    |
| 682 | SCN1A And SCN9A Antisense RNA 1                                  | SCN1A-AS1 |
| 683 | ADAM Metallopeptidase Domain 8                                   | ADAM8     |



|     |                                                            |          |
|-----|------------------------------------------------------------|----------|
| 684 | Late Cornified Envelope 3C                                 | LCE3C    |
| 685 | Late Cornified Envelope 3B                                 | LCE3B    |
| 686 | Synaptophysin                                              | SYP      |
| 687 | JunB Proto-Oncogene, AP-1 Transcription Factor Subunit     | JUNB     |
| 688 | Chromobox 5                                                | CBX5     |
| 689 | Galactosidase Alpha                                        | GLA      |
| 690 | Polypeptide N-Acetylgalactosaminyltransferase 3            | GALNT3   |
| 691 | Cadherin 11                                                | CDH11    |
| 692 | TNF Receptor Associated Factor 3                           | TRAF3    |
| 693 | Matrix Metalloproteinase 25                                | MMP25    |
| 694 | Fascin Actin-Bundling Protein 1                            | FSCN1    |
| 695 | MicroRNA 30b                                               | MIR30B   |
| 696 | Differentiation Antagonizing Non-Protein Coding RNA        | DANCR    |
| 697 | Dihydrofolate Reductase                                    | DHFR     |
| 698 | Survival Of Motor Neuron 2, Centromeric                    | SMN2     |
| 699 | Glutathione Synthetase                                     | GSS      |
| 700 | Mitochondrial Antiviral Signaling Protein                  | MAVS     |
| 701 | EGF Containing Fibulin Extracellular Matrix Protein 1      | EFEMP1   |
| 702 | Integrin Binding Sialoprotein                              | IBSP     |
| 703 | Ras Converting CAAX Endopeptidase 1                        | RCE1     |
| 704 | Peptidyl Arginine Deiminase 2                              | PADI2    |
| 705 | Pleckstrin                                                 | PLEK     |
| 706 | Serine Palmitoyltransferase Long Chain Base Subunit 1      | SPTLC1   |
| 707 | ETS2 Repressor Factor                                      | ERF      |
| 708 | Peptidylprolyl Cis/Trans Isomerase, NIMA-Interacting 1     | PIN1     |
| 709 | FUS RNA Binding Protein                                    | FUS      |
| 710 | ATP Binding Cassette Subfamily C Member 9                  | ABCC9    |
| 711 | Ceramide Synthase 3                                        | CERS3    |
| 712 | Gastrin                                                    | GAST     |
| 713 | SRY-Box Transcription Factor 9                             | SOX9     |
| 714 | Calcitonin Receptor                                        | CALCR    |
| 715 | Cullin 1                                                   | CUL1     |
| 716 | C-Type Lectin Domain Family 4 Member E                     | CLEC4E   |
| 717 | Placental Growth Factor                                    | PGF      |
| 718 | Snail Family Transcriptional Repressor 1                   | SNAI1    |
| 719 | TIA1 Cytotoxic Granule Associated RNA Binding Protein      | TIA1     |
| 720 | Proline-Serine-Threonine Phosphatase Interacting Protein 2 | PSTPIP2  |
| 721 | Ubiquitination Factor E4A                                  | UBE4A    |
| 722 | CD70 Molecule                                              | CD70     |
| 723 | Immunoglobulin Heavy Constant Mu                           | IGHM     |
| 724 | Dyskerin Pseudouridine Synthase 1                          | DKC1     |
| 725 | Chromosome 1 Open Reading Frame 141                        | C1orf141 |
| 726 | Hemoglobin Subunit Alpha 2                                 | HBA2     |
| 727 | Sirtuin 2                                                  | SIRT2    |

|     |                                                           |         |
|-----|-----------------------------------------------------------|---------|
| 728 | Furin, Paired Basic Amino Acid Cleaving Enzyme            | FURIN   |
| 729 | TGF-Beta Activated Kinase 1 (MAP3K7) Binding Protein 2    | TAB2    |
| 730 | ANTXR Cell Adhesion Molecule 1                            | ANTXR1  |
| 731 | Transcription Factor 3                                    | TCF3    |
| 732 | Leucine Rich Repeat Containing 8 VRAC Subunit A           | LRRC8A  |
| 733 | CD79b Molecule                                            | CD79B   |
| 734 | Prostaglandin Reductase 1                                 | PTGR1   |
| 735 | E2F Transcription Factor 1                                | E2F1    |
| 736 | Sad1 And UNC84 Domain Containing 2                        | SUN2    |
| 737 | ADAM Metallopeptidase With Thrombospondin Type 1 Motif 9  | ADAMTS9 |
| 738 | Ring Finger Protein 1                                     | RING1   |
| 739 | Carbonic Anhydrase 2                                      | CA2     |
| 740 | Galactosylceramidase                                      | GALC    |
| 741 | Growth Hormone Receptor                                   | GHR     |
| 742 | Immunoglobulin Lambda Like Polypeptide 1                  | IGLL1   |
| 743 | CXADR Ig-Like Cell Adhesion Molecule                      | CXADR   |
| 744 | Apoptotic Peptidase Activating Factor 1                   | APAF1   |
| 745 | Solute Carrier Family 29 Member 1 (Augustine Blood Group) | SLC29A1 |
| 746 | Solute Carrier Family 2 Member 10                         | SLC2A10 |
| 747 | ADAM Metallopeptidase Domain 28                           | ADAM28  |
| 748 | HOX Transcript Antisense RNA                              | HOTAIR  |
| 749 | TIMP Metallopeptidase Inhibitor 4                         | TIMP4   |
| 750 | Phosphoribosyl Pyrophosphate Synthetase 1                 | PRPS1   |
| 751 | GLIS Family Zinc Finger 3                                 | GLIS3   |
| 752 | Reticulon 4                                               | RTN4    |
| 753 | Double PHD Fingers 2                                      | DPF2    |
| 754 | Alkaline Phosphatase, Biomineralization Associated        | ALPL    |
| 755 | ADAM Metallopeptidase With Thrombospondin Type 1 Motif 6  | ADAMTS6 |
| 756 | Noggin                                                    | NOG     |
| 757 | C-Type Lectin Domain Family 1 Member A                    | CLEC1A  |
| 758 | Pvt1 Oncogene                                             | PVT1    |
| 759 | Fibroblast Growth Factor 23                               | FGF23   |
| 760 | LIM Domain Kinase 1                                       | LIMK1   |
| 761 | Sphingomyelin Phosphodiesterase 3                         | SMPD3   |
| 762 | Hexosaminidase Subunit Alpha                              | HEXA    |
| 763 | Ankyrin 3                                                 | ANK3    |
| 764 | Insulin Like Growth Factor Binding Protein 5              | IGFBP5  |
| 765 | Dentin Sialophosphoprotein                                | DSPP    |
| 766 | Salt Inducible Kinase 2                                   | SIK2    |
| 767 | Lymphoid Enhancer Binding Factor 1                        | LEF1    |
| 768 | Phospholipase A2 Activating Protein                       | PLAA    |
| 769 | NRAS Proto-Oncogene, GTPase                               | NRAS    |
| 770 | Integrin Subunit Alpha 1                                  | ITGA1   |
| 771 | MicroRNA 24-1                                             | MIR24-1 |

|     |                                                                  |           |
|-----|------------------------------------------------------------------|-----------|
| 772 | Adenylate Cyclase 1                                              | ADCY1     |
| 773 | G Protein-Coupled Receptor 101                                   | GPR101    |
| 774 | ADAM Metallopeptidase With Thrombospondin Type 1 Motif 17        | ADAMTS17  |
| 775 | POU Class 2 Homeobox Associating Factor 1                        | POU2AF1   |
| 776 | NCK Adaptor Protein 1                                            | NCK1      |
| 777 | N-Acetylneuraminic Acid Phosphatase                              | NANP      |
| 778 | Golgin, RAB6 Interacting                                         | GORAB     |
| 779 | RUNX Family Transcription Factor 3                               | RUNX3     |
| 780 | Ring Finger Protein 31                                           | RNF31     |
| 781 | Parkin RBR E3 Ubiquitin Protein Ligase                           | PRKN      |
| 782 | N-Sulfoglucosamine Sulfohydrolase                                | SGSH      |
| 783 | Growth Hormone Releasing Hormone                                 | GHRH      |
| 784 | SHANK Associated RH Domain Interactor                            | SHARPIN   |
| 785 | MAF BZIP Transcription Factor                                    | MAF       |
| 786 | CD1c Molecule                                                    | CD1C      |
| 787 | Dopamine Beta-Hydroxylase                                        | DBH       |
| 788 | SHC Adaptor Protein 1                                            | SHC1      |
| 789 | Gap Junction Protein Beta 3                                      | GJB3      |
| 790 | C-Type Lectin Domain Family 4 Member D                           | CLEC4D    |
| 791 | WASP Like Actin Nucleation Promoting Factor                      | WASL      |
| 792 | Maltase-Glucoamylase                                             | MGAM      |
| 793 | Melanocyte Inducing Transcription Factor                         | MITF      |
| 794 | Solute Carrier Family 19 Member 1                                | SLC19A1   |
| 795 | Matrix Gla Protein                                               | MGP       |
| 796 | CD1b Molecule                                                    | CD1B      |
| 797 | Aminomethyltransferase                                           | AMT       |
| 798 | ATPase Copper Transporting Beta                                  | ATP7B     |
| 799 | Transient Receptor Potential Cation Channel Subfamily M Member 8 | TRPM8     |
| 800 | Collagen Type VI Alpha 5 Chain                                   | COL6A5    |
| 801 | Nuclear Receptor Subfamily 1 Group I Member 3                    | NR1I3     |
| 802 | Bone Morphogenetic Protein Receptor Type 2                       | BMPR2     |
| 803 | Cell Migration Inducing Hyaluronidase 1                          | CEMIP     |
| 804 | Solute Carrier Family 29 Member 2                                | SLC29A2   |
| 805 | Fms Related Receptor Tyrosine Kinase 3                           | FLT3      |
| 806 | FLVCR Heme Transporter 1                                         | FLVCR1    |
| 807 | Ferrochelatase                                                   | FECH      |
| 808 | Aryl Hydrocarbon Receptor Interacting Protein                    | AIP       |
| 809 | Ubiquitin Recognition Factor In ER Associated Degradation 1      | UFD1      |
| 810 | TNF Receptor Superfamily Member 10d                              | TNFRSF10D |
| 811 | Calcium Activated Nucleotidase 1                                 | CANT1     |
| 812 | Cadherin 3                                                       | CDH3      |
| 813 | RAN, Member RAS Oncogene Family                                  | RAN       |
| 814 | Solute Carrier Family 22 Member 2                                | SLC22A2   |

|     |                                                                                 |         |
|-----|---------------------------------------------------------------------------------|---------|
| 815 | Sp7 Transcription Factor                                                        | SP7     |
| 816 | Glycoprotein Nmb                                                                | GPNMB   |
| 817 | Cbp/P300 Interacting Transactivator With Glu/Asp Rich Carboxy-Terminal Domain 2 | CITED2  |
| 818 | Rhomboid 5 Homolog 2                                                            | RHBDF2  |
| 819 | Tec Protein Tyrosine Kinase                                                     | TEC     |
| 820 | Spectrin Repeat Containing Nuclear Envelope Protein 1                           | SYNE1   |
| 821 | Protein Phosphatase 2 Phosphatase Activator                                     | PTPA    |
| 822 | Chaperonin Containing TCP1 Subunit 5                                            | CCT5    |
| 823 | Lectin, Mannose Binding 1                                                       | LMAN1   |
| 824 | Paired Box 5                                                                    | PAX5    |
| 825 | Ceramide Kinase                                                                 | CERK    |
| 826 | Succinate Dehydrogenase Complex Subunit C                                       | SDHC    |
| 827 | Gap Junction Protein Beta 4                                                     | GJB4    |
| 828 | LMBR1 Domain Containing 1                                                       | LMBRD1  |
| 829 | Dynein Axonemal Assembly Factor 2                                               | DNAAF2  |
| 830 | WRN RecQ Like Helicase                                                          | WRN     |
| 831 | Matrix Metallopeptidase 11                                                      | MMP11   |
| 832 | Spectrin Repeat Containing Nuclear Envelope Family Member 3                     | SYNE3   |
| 833 | Prostate Cancer Associated Non-Coding RNA 1                                     | PRNCR1  |
| 834 | JunD Proto-Oncogene, AP-1 Transcription Factor Subunit                          | JUND    |
| 835 | Chloride Voltage-Gated Channel 7                                                | CLCN7   |
| 836 | Pleckstrin Homology And RUN Domain Containing M1                                | PLEKHM1 |
| 837 | Neuropilin 1                                                                    | NRP1    |
| 838 | Apoptosis Inducing Factor Mitochondria Associated 1                             | AIFM1   |
| 839 | Neurotrophic Receptor Tyrosine Kinase 2                                         | NTRK2   |
| 840 | Osteoclastogenesis Associated Transmembrane Protein 1                           | OSTM1   |
| 841 | Transient Receptor Potential Cation Channel Subfamily C Member 6                | TRPC6   |
| 842 | ADAM Metallopeptidase Domain 9                                                  | ADAM9   |
| 843 | RAB7A, Member RAS Oncogene Family                                               | RAB7A   |
| 844 | Mitochondrially Encoded Cytochrome B                                            | MT-CYB  |
| 845 | Twist Family BHLH Transcription Factor 2                                        | TWIST2  |
| 846 | DnaJ Heat Shock Protein Family (Hsp40) Member B11                               | DNAJB11 |
| 847 | Tumor Protein P53 Binding Protein 1                                             | TP53BP1 |
| 848 | Polo Like Kinase 1                                                              | PLK1    |
| 849 | Lysosomal Associated Membrane Protein 3                                         | LAMP3   |
| 850 | Calbindin 2                                                                     | CALB2   |
| 851 | MicroRNA 377                                                                    | MIR377  |
| 852 | Urothelial Cancer Associated 1                                                  | UCA1    |
| 853 | Semaphorin 3A                                                                   | SEMA3A  |
| 854 | Succinate Dehydrogenase Complex Subunit D                                       | SDHD    |
| 855 | Interleukin 3 Receptor Subunit Alpha                                            | IL3RA   |
| 856 | X Inactive Specific Transcript                                                  | XIST    |

|     |                                                                                                      |          |
|-----|------------------------------------------------------------------------------------------------------|----------|
| 857 | Transforming Growth Factor Beta Induced                                                              | TGFB1    |
| 858 | ETS Variant Transcription Factor 6                                                                   | ETV6     |
| 859 | T-Box Transcription Factor 3                                                                         | TBX3     |
| 860 | Filamin Binding LIM Protein 1                                                                        | FBLIM1   |
| 861 | Solute Carrier Family 12 Member 2                                                                    | SLC12A2  |
| 862 | Solute Carrier Family 7 Member 11                                                                    | SLC7A11  |
| 863 | BSCL2 Lipid Droplet Biogenesis Associated, Seipin                                                    | BSCL2    |
| 864 | Serpin Family B Member 4                                                                             | SERPINB4 |
| 865 | Serine Palmitoyltransferase Long Chain Base Subunit 2                                                | SPTLC2   |
| 866 | Colon Cancer Associated Transcript 1                                                                 | CCAT1    |
| 867 | Leucine Rich Repeat Containing G Protein-Coupled Receptor 5                                          | LGR5     |
| 868 | Transmembrane Protein 178A                                                                           | TMEM178A |
| 869 | Endoplasmic Reticulum-Golgi Intermediate Compartment 1                                               | ERGIC1   |
| 870 | MicroRNA 186                                                                                         | MIR186   |
| 871 | Bone Morphogenetic Protein Receptor Type 1A                                                          | BMPR1A   |
| 872 | Cyclin Dependent Kinase 6                                                                            | CDK6     |
| 873 | SH3 Domain And Tetratricopeptide Repeats 2                                                           | SH3TC2   |
| 874 | MicroRNA 29b-1                                                                                       | MIR29B1  |
| 875 | Taurine Up-Regulated 1                                                                               | TUG1     |
| 876 | Stabilin 1                                                                                           | STAB1    |
| 877 | Lysophosphatidic Acid Receptor 3                                                                     | LPAR3    |
| 878 | LSM2 Homolog, U6 Small Nuclear RNA And MRNA<br>Degradation Associated                                | LSM2     |
| 879 | MicroRNA 211                                                                                         | MIR211   |
| 880 | G Protein Subunit Alpha 12                                                                           | GNA12    |
| 881 | Solute Carrier Organic Anion Transporter Family Member 4A1                                           | SLCO4A1  |
| 882 | PC4 And SFRS1 Interacting Protein 1                                                                  | PSIP1    |
| 883 | Mitochondrial Ribosomal Protein L45                                                                  | MRPL45   |
| 884 | Rho GTPase Activating Protein 23                                                                     | ARHGAP23 |
| 885 | Phospholipase B1                                                                                     | PLB1     |
| 886 | Serine/Threonine Kinase 39                                                                           | STK39    |
| 887 | Laminin Subunit Alpha 1                                                                              | LAMA1    |
| 888 | Aldo-Keto Reductase Family 1 Member C2                                                               | AKR1C2   |
| 889 | SWI/SNF Related, Matrix Associated, Actin Dependent Regulator<br>Of Chromatin, Subfamily D, Member 2 | SMARCD2  |
| 890 | ATPase Family AAA Domain Containing 1                                                                | ATAD1    |
| 891 | Adenosine Deaminase TRNA Specific 3                                                                  | ADAT3    |
| 892 | Beta-1,3-Glucuronyltransferase 1                                                                     | B3GAT1   |
| 893 | 2'-5'-Oligoadenylate Synthetase 1                                                                    | OAS1     |
| 894 | Iodothyronine Deiodinase 2                                                                           | DIO2     |
| 895 | Pericentrin                                                                                          | PCNT     |
| 896 | Transient Receptor Potential Cation Channel Subfamily M<br>Member 7                                  | TRPM7    |
| 897 | Growth Hormone Releasing Hormone Receptor                                                            | GHRHR    |

|     |                                                           |           |
|-----|-----------------------------------------------------------|-----------|
| 898 | Replication Factor C Subunit 1                            | RFC1      |
| 899 | Dopachrome Tautomerase                                    | DCT       |
| 900 | Lysosomal Associated Membrane Protein 2                   | LAMP2     |
| 901 | ABL Proto-Oncogene 1, Non-Receptor Tyrosine Kinase        | ABL1      |
| 902 | Biglycan                                                  | BGN       |
| 903 | Catenin Alpha 1                                           | CTNNA1    |
| 904 | Lysosomal Associated Membrane Protein 1                   | LAMP1     |
| 905 | SPG7 Matrix AAA Peptidase Subunit, Paraplegin             | SPG7      |
| 906 | Ubiquitin Like Modifier Activating Enzyme 7               | UBA7      |
| 907 | BMX Non-Receptor Tyrosine Kinase                          | BMX       |
| 908 | Myomesin 2                                                | MYOM2     |
| 909 | Long Intergenic Non-Protein Coding RNA 1554               | LINC01554 |
| 910 | Solute Carrier Family 40 Member 1                         | SLC40A1   |
| 911 | Isoprenylcysteine Carboxyl Methyltransferase              | ICMT      |
| 912 | Cadherin 2                                                | CDH2      |
| 913 | CCDC26 Long Non-Coding RNA                                | CCDC26    |
| 914 | Secreted LY6/PLAUR Domain Containing 1                    | SLURP1    |
| 915 | Latent Transforming Growth Factor Beta Binding Protein 4  | LTBP4     |
| 916 | MicroRNA 374a                                             | MIR374A   |
| 917 | Dynein Cytoplasmic 2 Heavy Chain 1                        | DYNC2H1   |
| 918 | S-Phase Kinase Associated Protein 1                       | SKP1      |
| 919 | Nucleoporin 153                                           | NUP153    |
| 920 | Sad1 And UNC84 Domain Containing 1                        | SUN1      |
| 921 | Glycerol-3-Phosphate Dehydrogenase 1                      | GPD1      |
| 922 | Promoter Of CDKN1A Antisense DNA Damage Activated RNA     | PANDAR    |
| 923 | Secreted Frizzled Related Protein 1                       | SFRP1     |
| 924 | Exportin 1                                                | XPO1      |
| 925 | Bone Marrow Stromal Cell Antigen 2                        | BST2      |
| 926 | RNA Binding Region (RNP1, RRM) Containing 3               | RNPC3     |
| 927 | F-Box And WD Repeat Domain Containing 7                   | FBXW7     |
| 928 | LDL Receptor Related Protein 5                            | LRP5      |
| 929 | Immunoglobulin Mu DNA Binding Protein 2                   | IGHMBP2   |
| 930 | Tubulin Alpha 1b                                          | TUBA1B    |
| 931 | Solute Carrier Family 25 Member 24                        | SLC25A24  |
| 932 | Senataxin                                                 | SETX      |
| 933 | Solute Carrier Family 12 Member 5                         | SLC12A5   |
| 934 | Hepatocellular Carcinoma Up-Regulated Long Non-Coding RNA | HULC      |
| 935 | HOXA Distal Transcript Antisense RNA                      | HOTTIP    |
| 936 | PTEN Induced Kinase 1                                     | PINK1     |
| 937 | TBC1 Domain Family Member 3                               | TBC1D3    |
| 938 | Dehydrogenase/Reductase 2                                 | DHRS2     |
| 939 | Death Domain Associated Protein                           | DAXX      |
| 940 | Cyclin G1                                                 | CCNG1     |
| 941 | N-Acylsphingosine Amidohydrolase 2                        | ASAH2     |

|     |                                                        |              |
|-----|--------------------------------------------------------|--------------|
| 942 | U2 Small Nuclear RNA Auxiliary Factor 1                | U2AF1        |
| 943 | Pyruvate Kinase L/R                                    | PKLR         |
| 944 | Nuclear Factor Of Activated T Cells 3                  | NFATC3       |
| 945 | Integrin Linked Kinase                                 | ILK          |
| 946 | Angiogenic Factor With G-Patch And FHA Domains 1       | AGGF1        |
| 947 | Sphingomyelin Phosphodiesterase Acid Like 3B           | SMPDL3B      |
| 948 | V-Set And Immunoglobulin Domain Containing 4           | VSIG4        |
| 949 | ATPase H+ Transporting Accessory Protein 1             | ATP6AP1      |
| 950 | Actin Filament Associated Protein 1                    | AFAP1        |
| 951 | Glycophorin C (Gerbich Blood Group)                    | GYPC         |
| 952 | Inhibitor Of DNA Binding 1, HLH Protein                | ID1          |
| 953 | ZFP57 Zinc Finger Protein                              | ZFP57        |
| 954 | SH3 And PX Domains 2A                                  | SH3PXD2A     |
| 955 | SUMO Specific Peptidase 7                              | SENP7        |
| 956 | Arylsulfatase A                                        | ARSA         |
| 957 | Lipase A, Lysosomal Acid Type                          | LIPA         |
| 958 | C-Type Lectin Domain Containing 6A                     | CLEC6A       |
| 959 | Cell Division Cycle 20                                 | CDC20        |
| 960 | Uncharacterized LOC100287329                           | LOC100287329 |
| 961 | Pyruvate Dehydrogenase Phosphatase Catalytic Subunit 1 | PDP1         |
| 962 | T-Box Transcription Factor 5                           | TBX5         |
| 963 | Antioxidant 1 Copper Chaperone                         | ATOX1        |
| 964 | UDP-Glucose Ceramide Glucosyltransferase               | UGCG         |
| 965 | MicroRNA 483                                           | MIR483       |
| 966 | Mannosidase Beta                                       | MANBA        |
| 967 | Catenin Alpha 2                                        | CTNNA2       |
| 968 | Mannosidase Alpha Class 1B Member 1                    | MAN1B1       |
| 969 | MacroH2A.1 Histone                                     | MACROH2A1    |
| 970 | Regulator Of G Protein Signaling 5                     | RGS5         |
| 971 | Integrin Subunit Beta 5                                | ITGB5        |
| 972 | Proprotein Convertase Subtilisin/Kexin Type 6          | PCSK6        |
| 973 | WT1 Transcription Factor                               | WT1          |
| 974 | Von Hippel-Lindau Tumor Suppressor                     | VHL          |
| 975 | Cathepsin E                                            | CTSE         |
| 976 | Zinc Finger Protein 683                                | ZNF683       |
| 977 | Phospholipase C Beta 3                                 | PLCB3        |
| 978 | Ubiquitination Factor E4B                              | UBE4B        |
| 979 | HOXA11 Antisense RNA                                   | HOXA11-AS    |
| 980 | Solute Carrier Family 28 Member 3                      | SLC28A3      |
| 981 | MIR210 Host Gene                                       | MIR210HG     |
| 982 | Minichromosome Maintenance Complex Component 5         | MCM5         |
| 983 | NPC Intracellular Cholesterol Transporter 2            | NPC2         |
| 984 | Peptidylglycine Alpha-Amidating Monooxygenase          | PAM          |
| 985 | Bone Morphogenetic Protein 3                           | BMP3         |

|      |                                                                  |          |
|------|------------------------------------------------------------------|----------|
| 986  | C9orf72-SMCR8 Complex Subunit                                    | C9orf72  |
| 987  | Heat Shock Protein Family B (Small) Member 8                     | HSPB8    |
| 988  | RNA Binding Motif Protein 19                                     | RBM19    |
| 989  | Wnt Family Member 3A                                             | WNT3A    |
| 990  | Keratin 15                                                       | KRT15    |
| 991  | WSC Domain Containing 2                                          | WSCD2    |
| 992  | Scm Like With Four Mbt Domains 2                                 | SFMBT2   |
| 993  | Small Nuclear Ribonucleoprotein U1 Subunit 70                    | SNRNP70  |
| 994  | Cancer Susceptibility 2                                          | CASC2    |
| 995  | Alpha-L-Iduronidase                                              | IDUA     |
| 996  | DEF6 Guanine Nucleotide Exchange Factor                          | DEF6     |
| 997  | Immunoglobulin Heavy Constant Gamma 3 (G3m Marker)               | IGHG3    |
| 998  | FAU Ubiquitin Like And Ribosomal Protein S30 Fusion              | FAU      |
| 999  | WW Domain Containing Transcription Regulator 1                   | WWTR1    |
| 1000 | Zinc Finger FYVE-Type Containing 16                              | ZFYVE16  |
| 1001 | MicroRNA 342                                                     | MIR342   |
| 1002 | Cytochrome P450 Family 51 Subfamily A Member 1                   | CYP51A1  |
| 1003 | Heterogeneous Nuclear Ribonucleoprotein C                        | HNRNPC   |
| 1004 | RING1 And YY1 Binding Protein                                    | RYBP     |
| 1005 | MicroRNA 18a                                                     | MIR18A   |
| 1006 | ST8 Alpha-N-Acetyl-Neuraminide Alpha-2,8-Sialyltransferase 4     | ST8SIA4  |
| 1007 | Transient Receptor Potential Cation Channel Subfamily M Member 3 | TRPM3    |
| 1008 | Solute Carrier Family 34 Member 1                                | SLC34A1  |
| 1009 | Mastermind Like Transcriptional Coactivator 3                    | MAML3    |
| 1010 | Secreted Frizzled Related Protein 2                              | SFRP2    |
| 1011 | ATPase H+ Transporting V0 Subunit A2                             | ATP6V0A2 |
| 1012 | Insulin Like Growth Factor Binding Protein 6                     | IGFBP6   |
| 1013 | Small Nuclear Ribonucleoprotein Polypeptide N                    | SNRPN    |
| 1014 | Bone Morphogenetic Protein 1                                     | BMP1     |
| 1015 | Leucine Rich Repeat Kinase 1                                     | LRRK1    |
| 1016 | Heterogeneous Nuclear Ribonucleoprotein D Like                   | HNRNPDL  |
| 1017 | Serpin Family B Member 3                                         | SERPINB3 |
| 1018 | Ring-Box 1                                                       | RBX1     |
| 1019 | Anti-Mullerian Hormone                                           | AMH      |
| 1020 | Vav Guanine Nucleotide Exchange Factor 3                         | VAV3     |
| 1021 | Radical S-Adenosyl Methionine Domain Containing 2                | RSAD2    |
| 1022 | Glycogen Phosphorylase, Muscle Associated                        | PYGM     |
| 1023 | OCA2 Melanosomal Transmembrane Protein                           | OCA2     |
| 1024 | WW Domain Containing E3 Ubiquitin Protein Ligase 1               | WWP1     |
| 1025 | Macrophage Receptor With Collagenous Structure                   | MARCO    |
| 1026 | Ataxin 3                                                         | ATXN3    |
| 1027 | Leucine Zipper Tumor Suppressor 1                                | LZTS1    |
| 1028 | Transcription Factor EB                                          | TFEB     |



|      |                                                                 |              |
|------|-----------------------------------------------------------------|--------------|
| 1029 | ATP Binding Cassette Subfamily C Member 5                       | ABCC5        |
| 1030 | Complement Factor H Related 1                                   | CFHR1        |
| 1031 | Zinc Finger DHHC-Type Palmitoyltransferase 2                    | ZDHHC2       |
| 1032 | Cystatin F                                                      | CST7         |
| 1033 | PTGS2 Antisense NFKB1 Complex-Mediated Expression Regulator RNA | PACERR       |
| 1034 | Protoporphyrinogen Oxidase                                      | PPOX         |
| 1035 | D-2-Hydroxyglutarate Dehydrogenase                              | D2HGDH       |
| 1036 | Alpha And Gamma Adaptin Binding Protein                         | AAGAB        |
| 1037 | Metaxin 1                                                       | MTX1         |
| 1038 | Mannosidase Alpha Class 2C Member 1                             | MAN2C1       |
| 1039 | Centrosomal Protein 89                                          | CEP89        |
| 1040 | Centrosomal Protein 192                                         | CEP192       |
| 1041 | DnaJ Heat Shock Protein Family (Hsp40) Member C27               | DNAJC27      |
| 1042 | Meiotic Double-Stranded Break Formation Protein 1               | MEI1         |
| 1043 | Prickle Planar Cell Polarity Protein 4                          | PRICKLE4     |
| 1044 | Matrix Remodeling Associated 8                                  | MXRA8        |
| 1045 | Elongator Acetyltransferase Complex Subunit 6                   | ELP6         |
| 1046 | Valosin Containing Protein Lysine Methyltransferase             | VCPKMT       |
| 1047 | HNF1A Antisense RNA 1                                           | HNF1A-AS1    |
| 1048 | Phosphodiesterase 11A                                           | PDE11A       |
| 1049 | Heterogeneous Nuclear Ribonucleoprotein H2                      | HNRNPH2      |
| 1050 | Small Nuclear Ribonucleoprotein D3 Polypeptide                  | SNRPD3       |
| 1051 | IKBKG Recombination Region                                      | LOC107988021 |
| 1052 | IKBKG Downstream Recombination Region                           | LOC107988022 |
| 1053 | Amylo-Alpha-1, 6-Glucosidase, 4-Alpha-Glucanotransferase        | AGL          |
| 1054 | Uncharacterized LOC101448202                                    | LOC101448202 |
| 1055 | Deoxyhypusine Synthase                                          | DHPS         |
| 1056 | Syntaxin 5                                                      | STX5         |
| 1057 | 4-Hydroxyphenylpyruvate Dioxygenase                             | HPD          |
| 1058 | Eukaryotic Translation Elongation Factor 1 Alpha 1              | EEF1A1       |
| 1059 | Syntrophin Beta 2                                               | SNTB2        |
| 1060 | MicroRNA 664a                                                   | MIR664A      |
| 1061 | EGF Domain Specific O-Linked N-Acetylglucosamine Transferase    | EOGT         |
| 1062 | Small Nuclear Ribonucleoprotein Polypeptide A                   | SNRPA        |
| 1063 | G Protein-Coupled Receptor 108                                  | GPR108       |
| 1064 | VPS35 Retromer Complex Component                                | VPS35        |
| 1065 | Sphingomyelin Synthase 1                                        | SGMS1        |
| 1066 | COP9 Signalosome Subunit 3                                      | COPS3        |
| 1067 | Copper Metabolism Domain Containing 1                           | COMMD1       |
| 1068 | Mannose-6-Phosphate Receptor, Cation Dependent                  | M6PR         |
| 1069 | MicroRNA 139                                                    | MIR139       |
| 1070 | Wnt Family Member 10B                                           | WNT10B       |

|      |                                                                  |              |
|------|------------------------------------------------------------------|--------------|
| 1071 | High Mobility Group AT-Hook 2                                    | HMGA2        |
| 1072 | Indian Hedgehog Signaling Molecule                               | IHH          |
| 1073 | BRAF-Activated Non-Protein Coding RNA                            | BANCR        |
| 1074 | Long Noncoding RNA Activated By TGF-Beta                         | LNCRNA-ATB   |
| 1075 | Alpha-L-Fucosidase 1                                             | FUCA1        |
| 1076 | Centromere Protein E                                             | CENPE        |
| 1077 | Aquarius Intron-Binding Spliceosomal Factor                      | AQR          |
| 1078 | Hemoglobin Subunit Theta 1                                       | HBQ1         |
| 1079 | Zinc Finger And BTB Domain Containing 6                          | ZBTB6        |
| 1080 | Trafficking Protein Particle Complex Subunit 2B                  | TRAPPC2B     |
| 1081 | Protein Tyrosine Phosphatase Receptor Type G                     | PTPRG        |
| 1082 | Polycomb Group Ring Finger 2                                     | PCGF2        |
| 1083 | Mature T Cell Proliferation 1                                    | MTCP1        |
| 1084 | MicroRNA 614                                                     | MIR614       |
| 1085 | MicroRNA 520a                                                    | MIR520A      |
| 1086 | Colon Cancer Associated Transcript 2                             | CCAT2        |
| 1087 | Myosin Heavy Chain Gene Cluster Antisense RNA                    | MYHAS        |
| 1088 | IKBKGP1 Recombination Region                                     | LOC107988024 |
| 1089 | IKBKGP1 Upstream Recombination Region                            | LOC107988025 |
| 1090 | Phytanoyl-CoA 2-Hydroxylase                                      | PHYH         |
| 1091 | 5'-Aminolevulinate Synthase 1                                    | ALAS1        |
| 1092 | Transient Receptor Potential Cation Channel Subfamily C Member 3 | TRPC3        |
| 1093 | ZEB1 Antisense RNA 1                                             | ZEB1-AS1     |
| 1094 | Transient Receptor Potential Cation Channel Subfamily C Member 4 | TRPC4        |
| 1095 | Protein Tyrosine Kinase 6                                        | PTK6         |
| 1096 | Transient Receptor Potential Cation Channel Subfamily V Member 6 | TRPV6        |
| 1097 | Hydroxymethylbilane Synthase                                     | HMBS         |
| 1098 | Keratin 24                                                       | KRT24        |
| 1099 | FOXF1 Adjacent Non-Coding Developmental Regulatory RNA           | FENDRR       |
| 1100 | NPC Intracellular Cholesterol Transporter 1                      | NPC1         |
| 1101 | Farnesyl Diphosphate Synthase                                    | FDPS         |
| 1102 | Plexin A1                                                        | PLXNA1       |
| 1103 | Golgi Reassembly Stacking Protein 1                              | GORASP1      |
| 1104 | Solute Carrier Organic Anion Transporter Family Member 3A1       | SLCO3A1      |
| 1105 | Centromere Protein V                                             | CENPV        |
| 1106 | Small Nucleolar RNA Host Gene 1                                  | SNHG1        |
| 1107 | Prostate Cancer Associated Transcript 1                          | PCAT1        |
| 1108 | NNT Antisense RNA 1                                              | NNT-AS1      |
| 1109 | G Protein Subunit Alpha 15                                       | GNA15        |
| 1110 | Mannose Receptor C Type 2                                        | MRC2         |
| 1111 | Sphingomyelin Phosphodiesterase 2                                | SMPD2        |

|      |                                                                  |            |
|------|------------------------------------------------------------------|------------|
| 1112 | TATA-Box Binding Protein Associated Factor 3                     | TAF3       |
| 1113 | Matrix Metalloproteinase 16                                      | MMP16      |
| 1114 | Transcription Factor Binding To IGHM Enhancer 3                  | TFE3       |
| 1115 | Nudix Hydrolase 6                                                | NUDT6      |
| 1116 | Fumarate Hydratase                                               | FH         |
| 1117 | Hemojuvelin BMP Co-Receptor                                      | HJV        |
| 1118 | Microtubule Affinity Regulating Kinase 3                         | MARK3      |
| 1119 | Mannosidase Alpha Class 2A Member 1                              | MAN2A1     |
| 1120 | Rho Related BTB Domain Containing 2                              | RHOBTB2    |
| 1121 | Fibroblast Growth Factor 6                                       | FGF6       |
| 1122 | Uroplakin 1A                                                     | UPK1A      |
| 1123 | Trichohyalin                                                     | TCHH       |
| 1124 | SOX2 Overlapping Transcript                                      | SOX2-OT    |
| 1125 | Breast Cancer Anti-Estrogen Resistance 4                         | BCAR4      |
| 1126 | HIF1A Antisense RNA 2                                            | HIF1A-AS2  |
| 1127 | FOXC2 Antisense RNA 1                                            | FOXC2-AS1  |
| 1128 | Long Intergenic Non-Protein Coding RNA 901                       | LINC00901  |
| 1129 | Immunoglobulin Heavy Variable 4-38-2                             | IGHV4-38-2 |
| 1130 | Ubiquitin Specific Peptidase 6                                   | USP6       |
| 1131 | WEE1 G2 Checkpoint Kinase                                        | WEE1       |
| 1132 | E2F Transcription Factor 4                                       | E2F4       |
| 1133 | Glucosylceramidase Beta 2                                        | GBA2       |
| 1134 | Golgin B1                                                        | GOLGB1     |
| 1135 | PHD Finger Protein 6                                             | PHF6       |
| 1136 | SEC61 Translocon Subunit Alpha 1                                 | SEC61A1    |
| 1137 | Msh Homeobox 2                                                   | MSX2       |
| 1138 | Transferrin Receptor 2                                           | TFR2       |
| 1139 | Ring Finger Protein 135                                          | RNF135     |
| 1140 | RB Transcriptional Corepressor Like 1                            | RBL1       |
| 1141 | Phosphatidylinositol Transfer Protein Alpha                      | PITPNA     |
| 1142 | Transient Receptor Potential Cation Channel Subfamily C Member 5 | TRPC5      |
| 1143 | Solute Carrier Family 15 Member 2                                | SLC15A2    |
| 1144 | WW Domain Containing E3 Ubiquitin Protein Ligase 2               | WWP2       |
| 1145 | Phosphate Regulating Endopeptidase Homolog X-Linked              | PHEX       |
| 1146 | Diacylglycerol Kinase Theta                                      | DGKQ       |
| 1147 | IQ Motif Containing GTPase Activating Protein 2                  | IQGAP2     |
| 1148 | G3BP Stress Granule Assembly Factor 1                            | G3BP1      |
| 1149 | Smoothelin                                                       | SMTN       |
| 1150 | RAB7B, Member RAS Oncogene Family                                | RAB7B      |
| 1151 | CLN6 Transmembrane ER Protein                                    | CLN6       |
| 1152 | Mannose-Binding Lectin Family Member 3, Pseudogene               | MBL3P      |
| 1153 | Karyopherin Subunit Alpha 4                                      | KPNA4      |
| 1154 | 2'-5'-Oligoadenylate Synthetase 3                                | OAS3       |

|      |                                                                  |          |
|------|------------------------------------------------------------------|----------|
| 1155 | UTP6 Small Subunit Processome Component                          | UTP6     |
| 1156 | H3.3 Histone B                                                   | H3-3B    |
| 1157 | Ephrin A2                                                        | EFNA2    |
| 1158 | Olfactory Receptor Family 4 Subfamily D Member 2                 | OR4D2    |
| 1159 | Dynactin Subunit 1                                               | DCTN1    |
| 1160 | Achaete-Scute Family BHLH Transcription Factor 1                 | ASCL1    |
| 1161 | Calnexin                                                         | CANX     |
| 1162 | Pancreatic Polypeptide                                           | PPY      |
| 1163 | G3BP Stress Granule Assembly Factor 2                            | G3BP2    |
| 1164 | YEATS Domain Containing 2                                        | YEATS2   |
| 1165 | Melanotransferrin                                                | MELTF    |
| 1166 | Spartin                                                          | SPART    |
| 1167 | Pancreatic And Duodenal Homeobox 1                               | PDX1     |
| 1168 | Pyrroline-5-Carboxylate Reductase 1                              | PYCR1    |
| 1169 | Aminolevulinate Dehydratase                                      | ALAD     |
| 1170 | Isocitrate Dehydrogenase (NAD(+)) 3 Non-Catalytic Subunit Beta   | IDH3B    |
| 1171 | Transient Receptor Potential Cation Channel Subfamily M Member 6 | TRPM6    |
| 1172 | FYVE, RhoGEF And PH Domain Containing 4                          | FGD4     |
| 1173 | RB Transcriptional Corepressor Like 2                            | RBL2     |
| 1174 | Ubiquilin 2                                                      | UBQLN2   |
| 1175 | Golgin A2                                                        | GOLGA2   |
| 1176 | Glutathione S-Transferase Mu 5                                   | GSTM5    |
| 1177 | Collectin Subfamily Member 12                                    | COLEC12  |
| 1178 | Ly1 Antibody Reactive                                            | LYAR     |
| 1179 | Zinc Fingers And Homeoboxes 2                                    | ZHX2     |
| 1180 | Centriolar Coiled-Coil Protein 110                               | CCP110   |
| 1181 | Centlein                                                         | CNTLN    |
| 1182 | Keratin 31                                                       | KRT31    |
| 1183 | Coordinator Of PRMT5 And Differentiation Stimulator              | COPRS    |
| 1184 | Integrin Subunit Beta Like 1                                     | ITGBL1   |
| 1185 | Solute Carrier Family 12 Member 6                                | SLC12A6  |
| 1186 | Aldehyde Dehydrogenase 18 Family Member A1                       | ALDH18A1 |
| 1187 | 5'-Aminolevulinate Synthase 2                                    | ALAS2    |
| 1188 | Glycophorin A (MNS Blood Group)                                  | GYP A    |
| 1189 | WNK Lysine Deficient Protein Kinase 4                            | WNK4     |
| 1190 | Distal-Less Homeobox 3                                           | DLX3     |
| 1191 | Homeobox C13                                                     | HOXC13   |
| 1192 | Secretion Associated Ras Related GTPase 1A                       | SAR1A    |
| 1193 | Alpha-L-Fucosidase 2                                             | FUCA2    |
| 1194 | Tubulin Gamma Complex Associated Protein 6                       | TUBGCP6  |
| 1195 | NDRG Family Member 4                                             | NDRG4    |
| 1196 | Acyl-CoA Synthetase Short Chain Family Member 3                  | ACSS3    |
| 1197 | Lysine Methyltransferase 2B                                      | KMT2B    |

|      |                                                                        |          |
|------|------------------------------------------------------------------------|----------|
| 1198 | NPL4 Homolog, Ubiquitin Recognition Factor                             | NPLOC4   |
| 1199 | RB Binding Protein 5, Histone Lysine Methyltransferase Complex Subunit | RBBP5    |
| 1200 | NSF Attachment Protein Gamma                                           | NAPG     |
| 1201 | Pleckstrin Homology Like Domain Family B Member 1                      | PHLDB1   |
| 1202 | Succinyl-CoA:Glutarate-CoA Transferase                                 | SUGCT    |
| 1203 | Keratin 72                                                             | KRT72    |
| 1204 | Seryl-TRNA Synthetase 1                                                | SARS1    |
| 1205 | ATPase Family AAA Domain Containing 5                                  | ATAD5    |
| 1206 | Stress Induced Phosphoprotein 1                                        | STIP1    |
| 1207 | Dynein Light Chain LC8-Type 1                                          | DYNLL1   |
| 1208 | Placenta Associated 8                                                  | PLAC8    |
| 1209 | Myeloma Overexpressed                                                  | MYEOV    |
| 1210 | Farnesyl-Diphosphate Farnesyltransferase 1                             | FDFT1    |
| 1211 | Osteoglycin                                                            | OGN      |
| 1212 | H3.3 Histone A                                                         | H3-3A    |
| 1213 | MicroRNA 218-1                                                         | MIR218-1 |
| 1214 | DLC1 Rho GTPase Activating Protein                                     | DLC1     |
| 1215 | Nuclear Factor I B                                                     | NFIB     |
| 1216 | EvC Ciliary Complex Subunit 1                                          | EVC      |
| 1217 | MicroRNA 218-2                                                         | MIR218-2 |
| 1218 | Acid Phosphatase 2, Lysosomal                                          | ACP2     |
| 1219 | EvC Ciliary Complex Subunit 2                                          | EVC2     |

---
